# Supplementary material for: Concise synthesis of atorvastatin lactone under high-speed vibration milling conditions
Source: Royal Society of Chemistry journal article supplement (doi:10.1039/c4qo00052h), 2014-01-01
Supplement: c4qo00052h1.pdf [file c4qo00052h1.pdf]

## Concise synthesis of atorvastatin lactone under high-speed vibration milling conditions

Verónica Estévez, Mercedes Villacampa and J. Carlos Menéndez\*

*Departamento de Química Orgánica y Farmacéutica, Facultad de Farmacia*

*Universidad Complutense, 28040 Madrid, Spain*

*e-mail: [josecm@farm.ucm.es](mailto:josecm@farm.ucm.es)*

### Table of contents:

|                                            |         |
|--------------------------------------------|---------|
| Spectra of compound <b>2</b>               | S2-S5   |
| Spectra of compound <b>6</b>               | S6-S9   |
| Spectra of compound <b>7a</b>              | S10-S13 |
| Spectra of compound <b>7b</b>              | S14-S17 |
| Spectra of compound <b>8</b>               | S18-S20 |
| Spectra of compound <b>1</b>               | S21-S24 |
| Spectra of <b>atorvastatin lactone (9)</b> | S25-S27 |

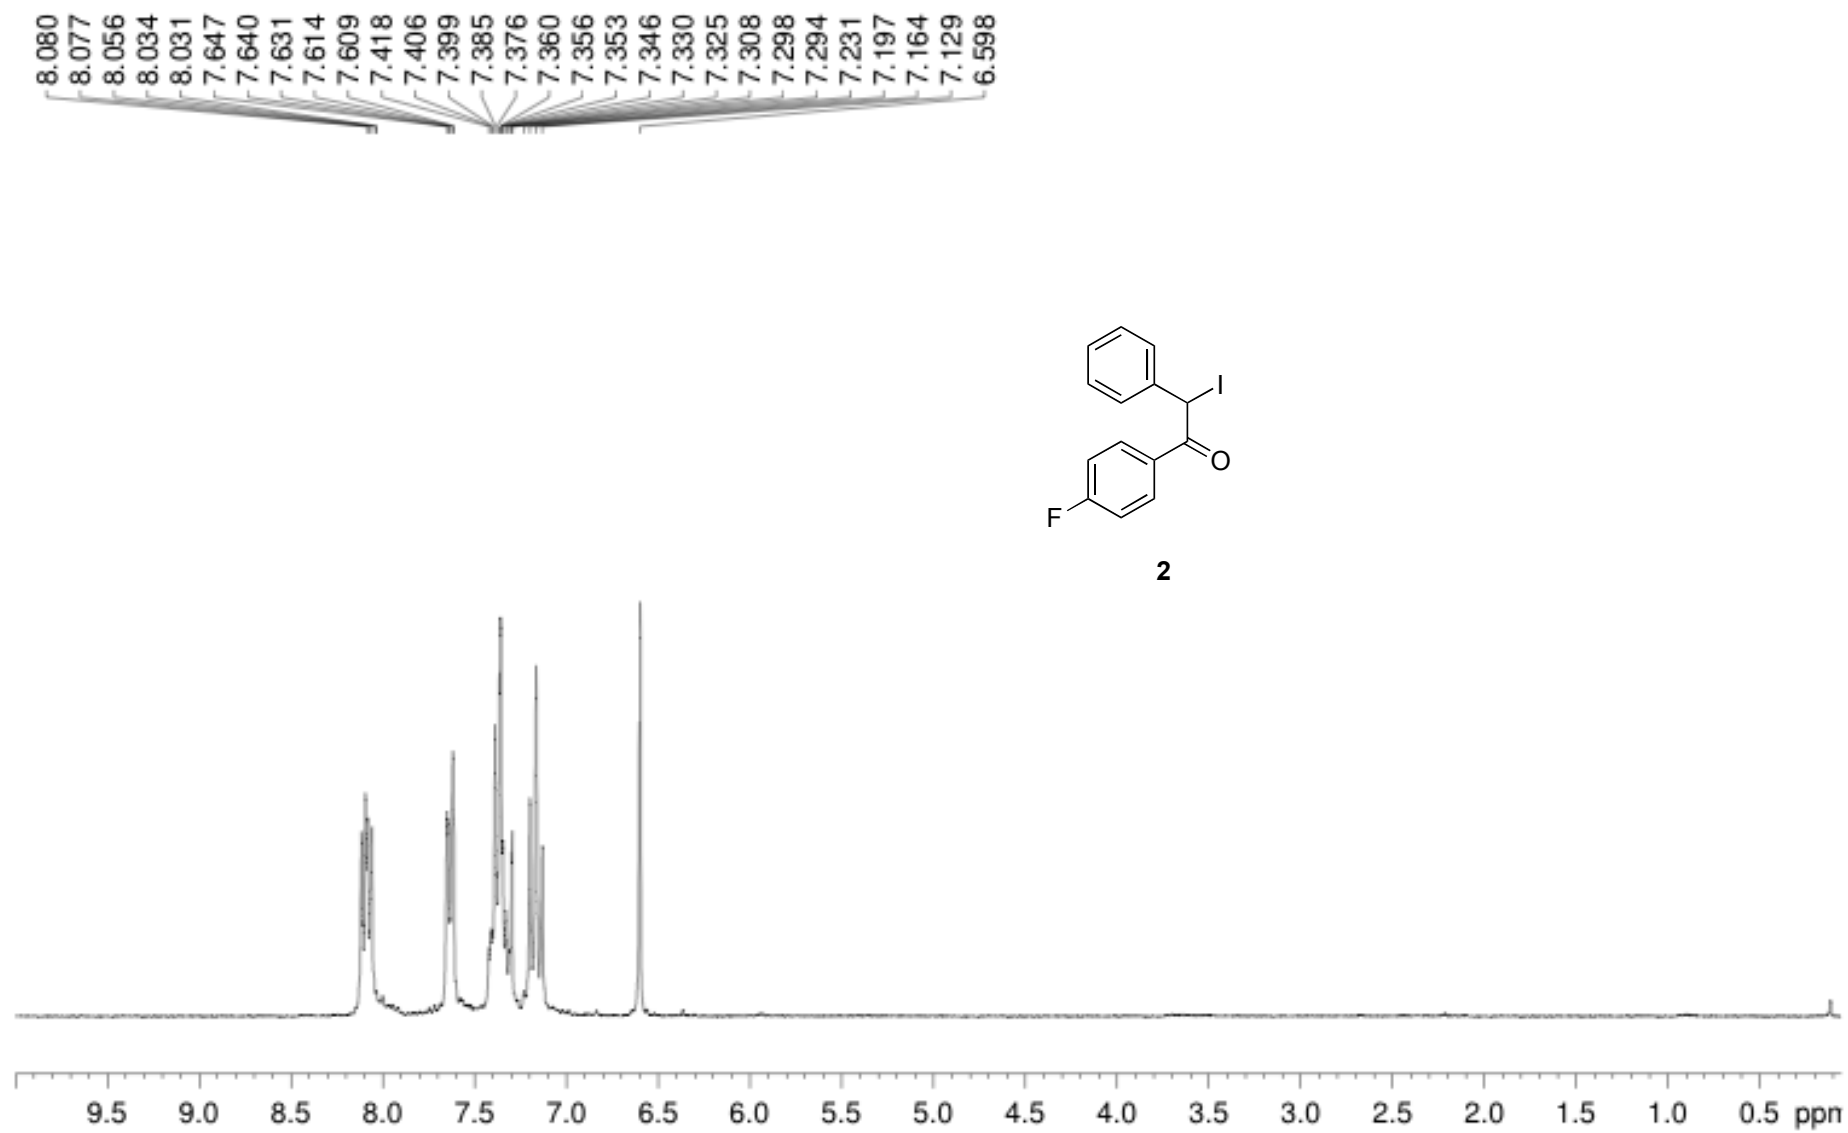

$^1\text{H}$  NMR spectrum of compound **2**

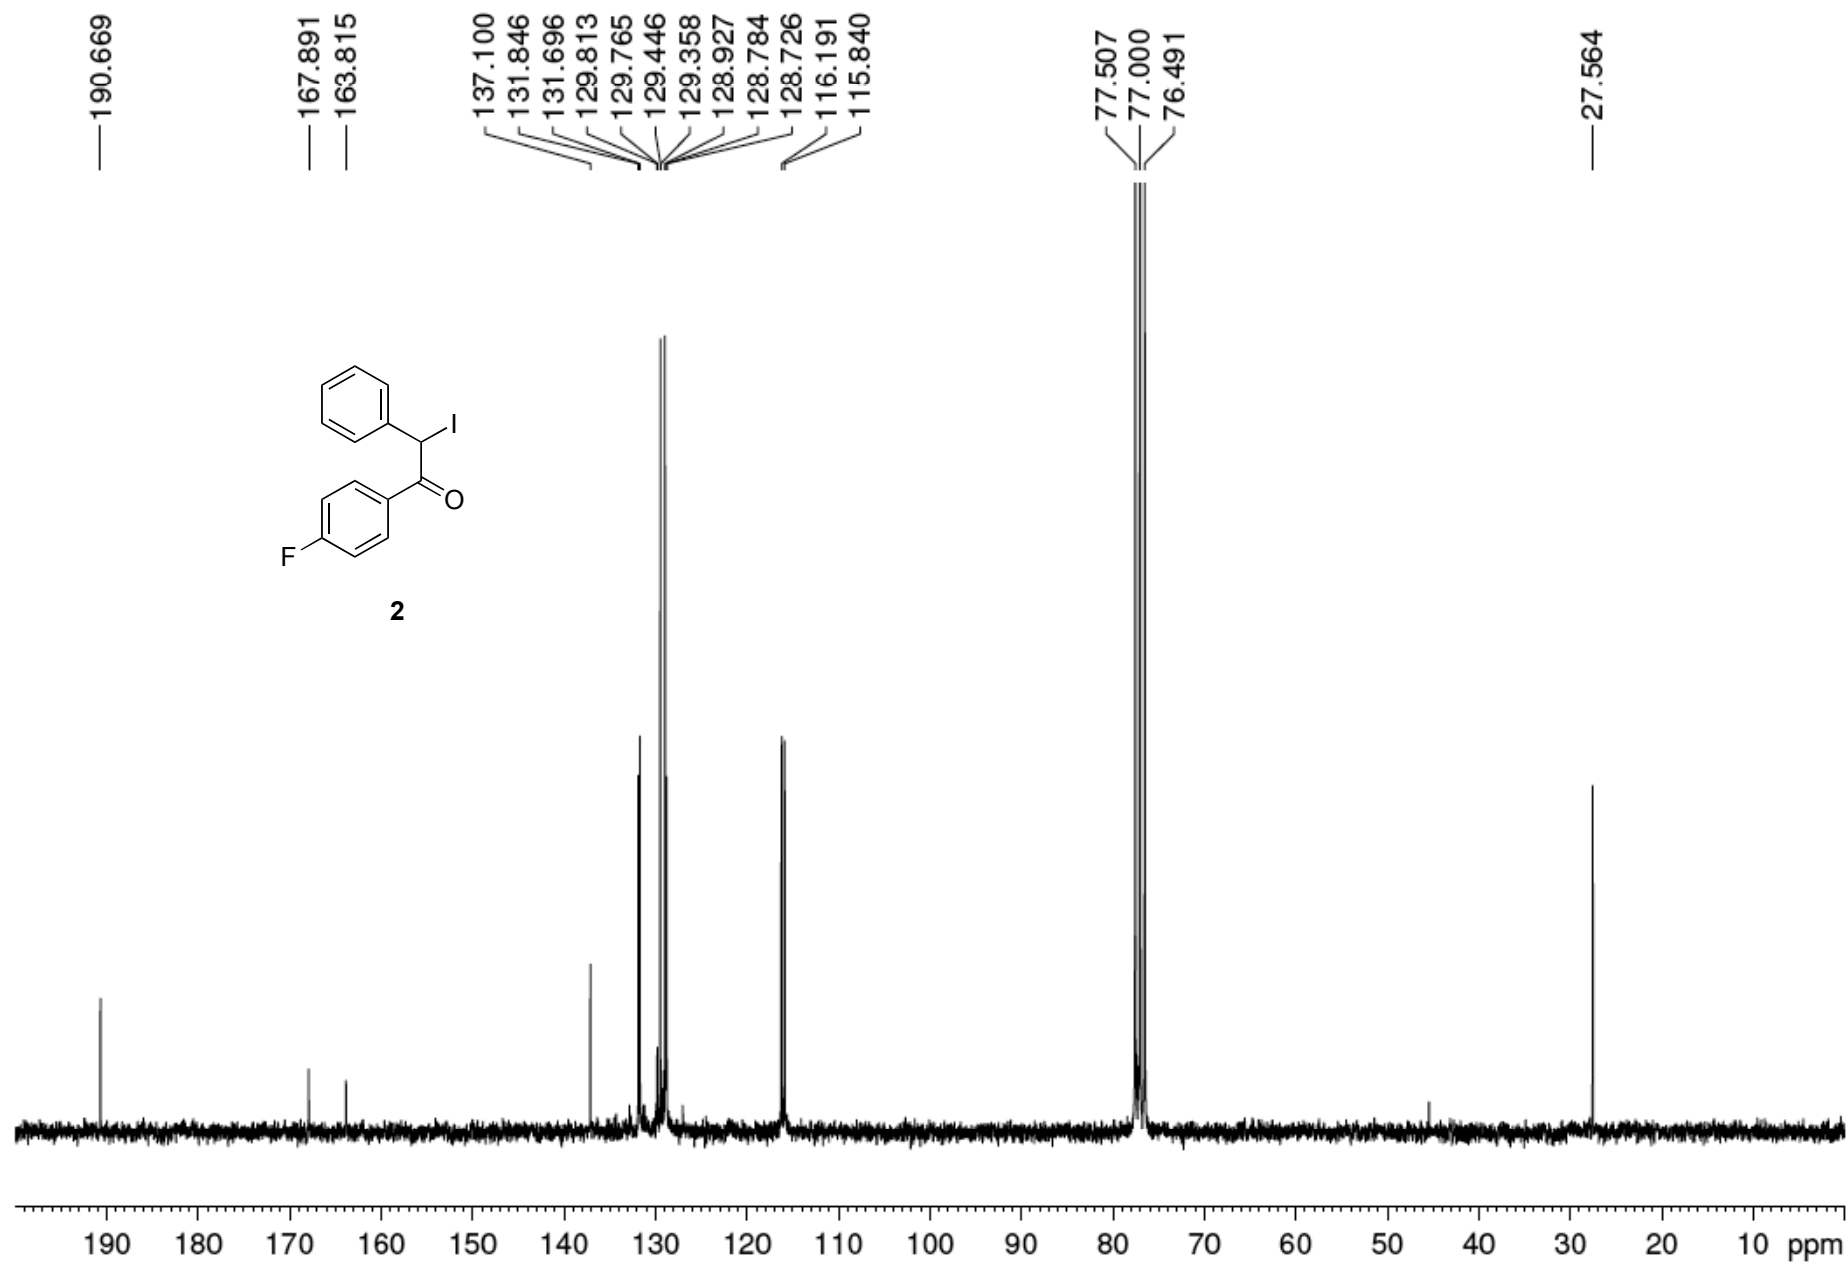

$^{13}\text{C}$  NMR spectrum of compound **2**

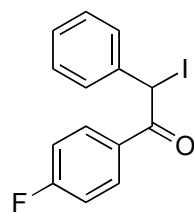

**2**

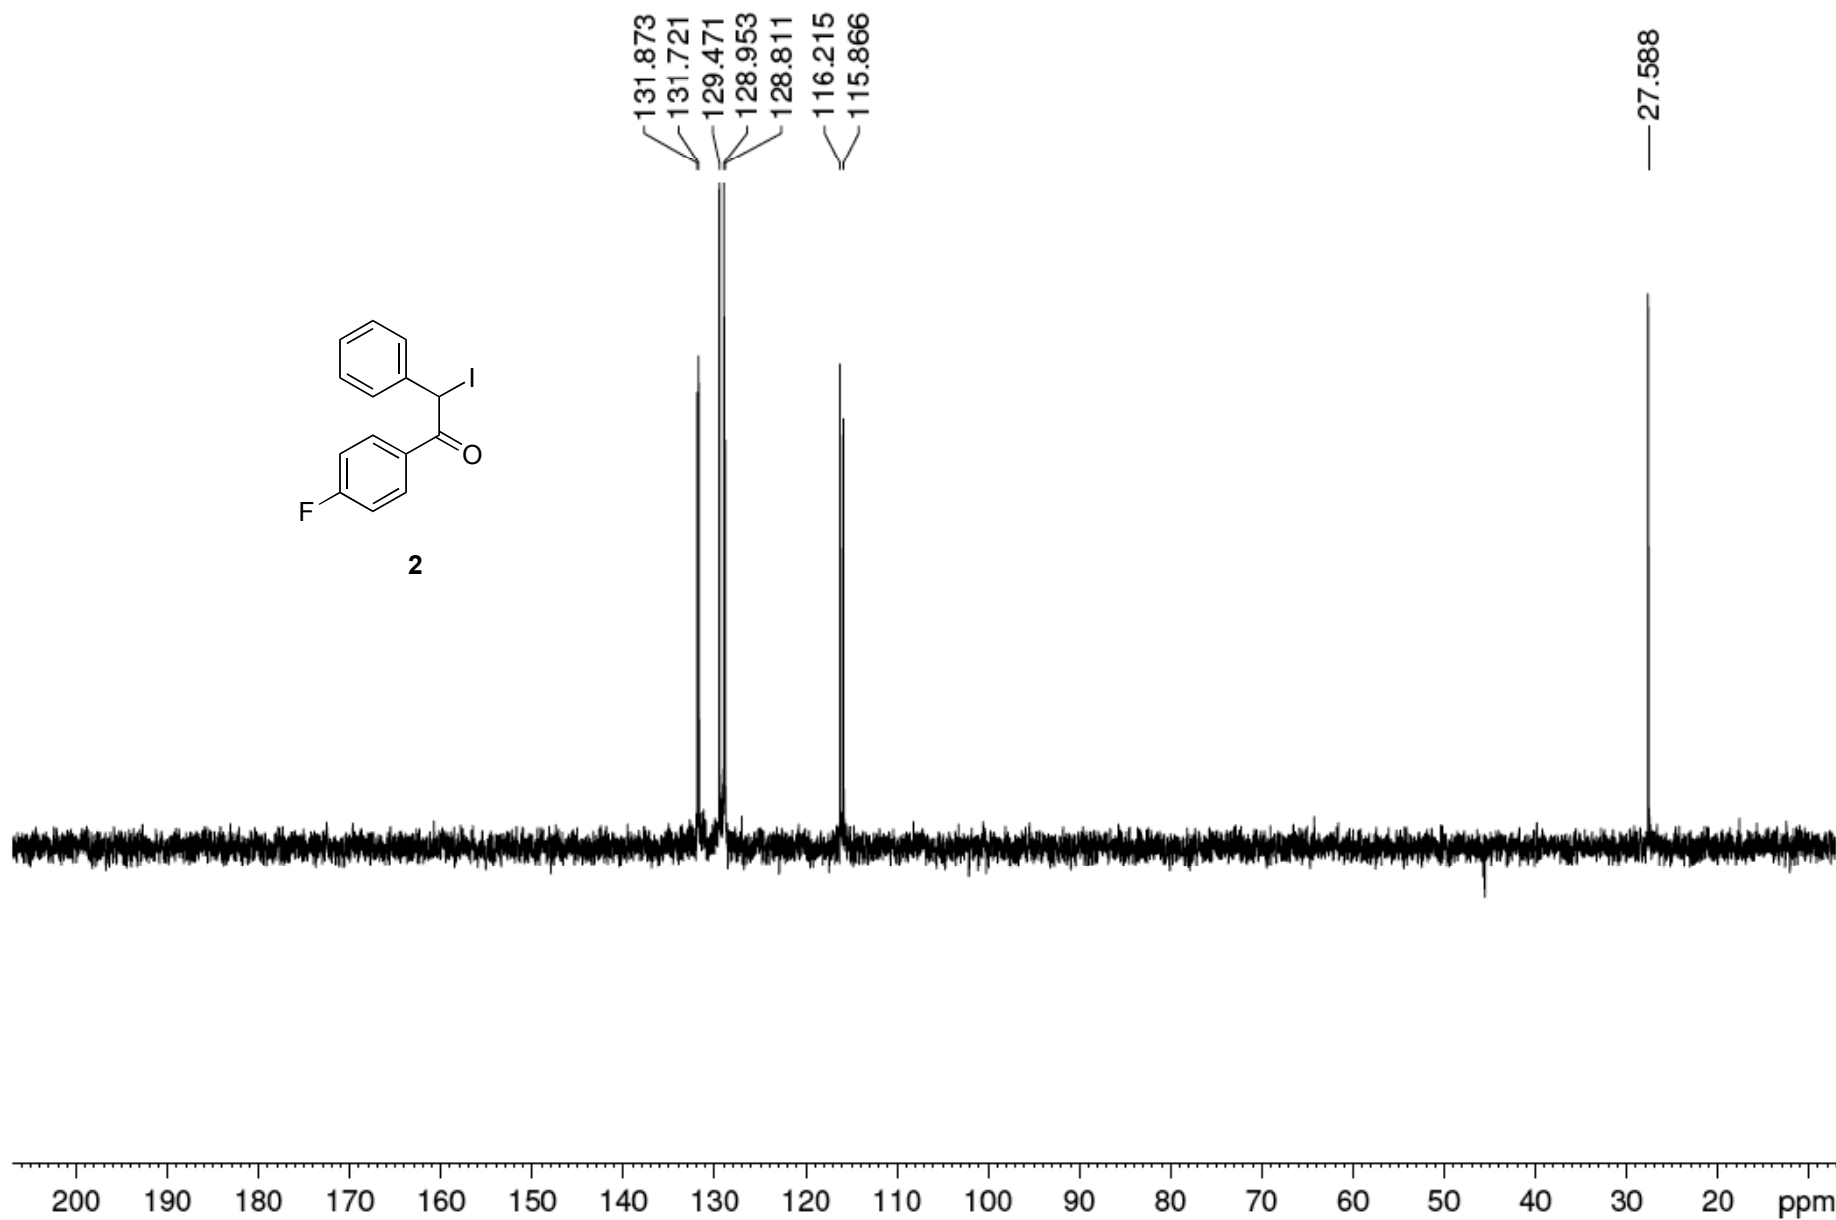

DEPT-135 spectrum of compound **2**

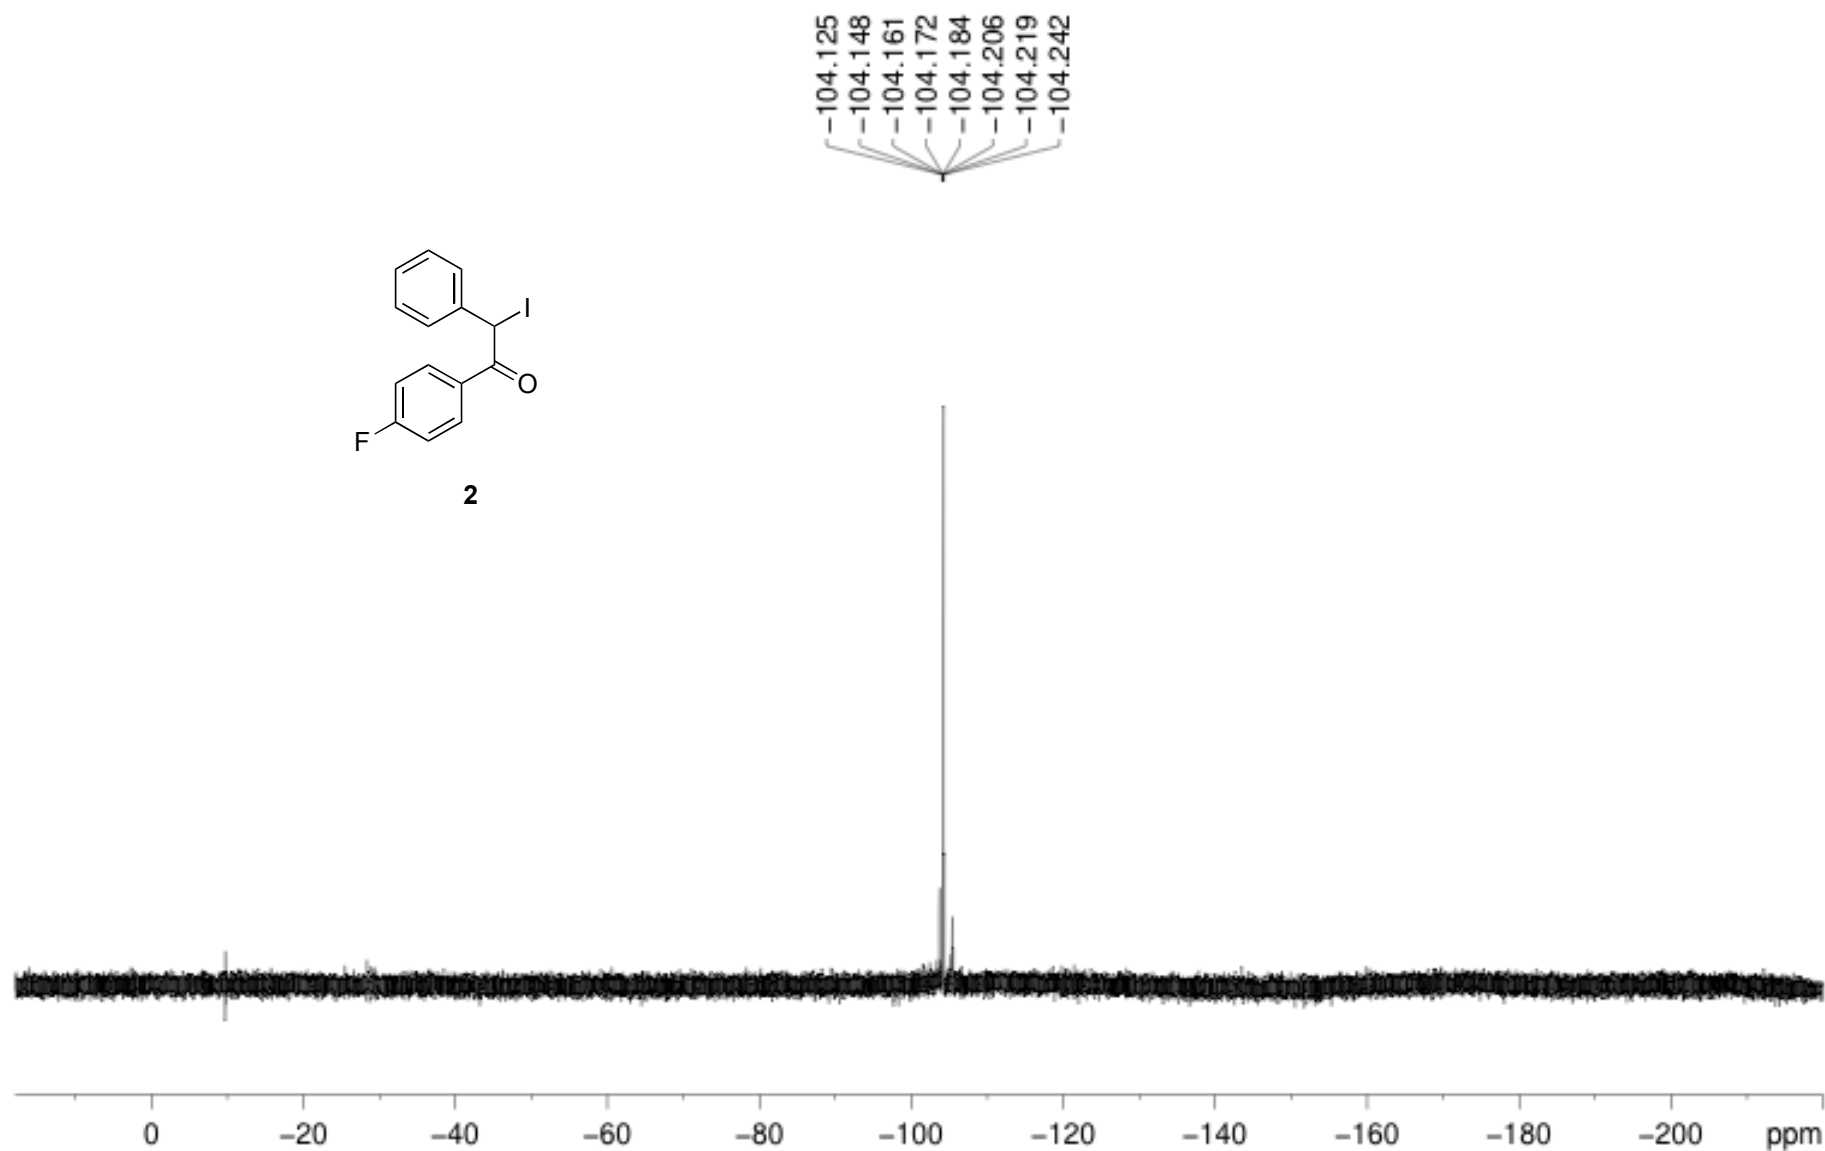

$^{19}\text{F}$  NMR spectrum of compound **2**

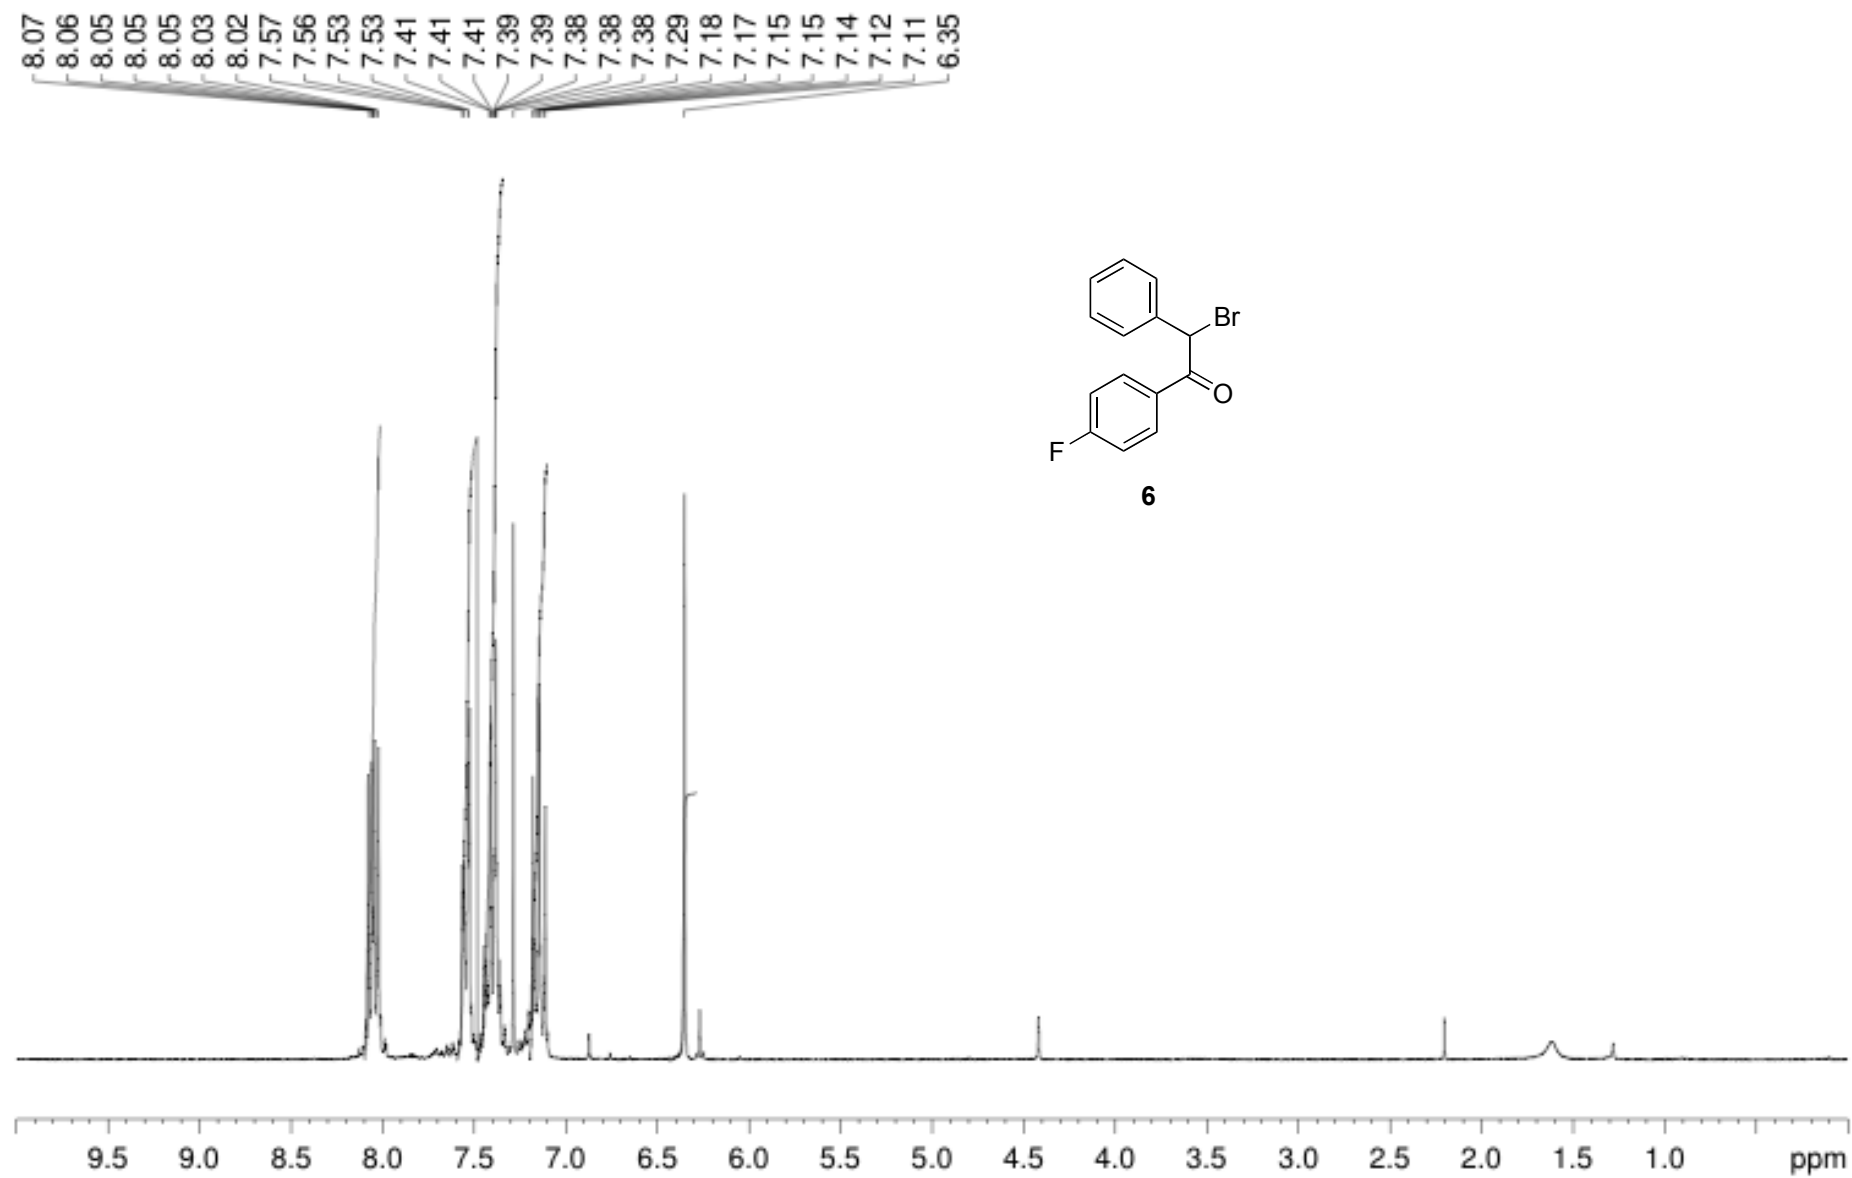

$^1\text{H}$  NMR spectrum of compound **6**

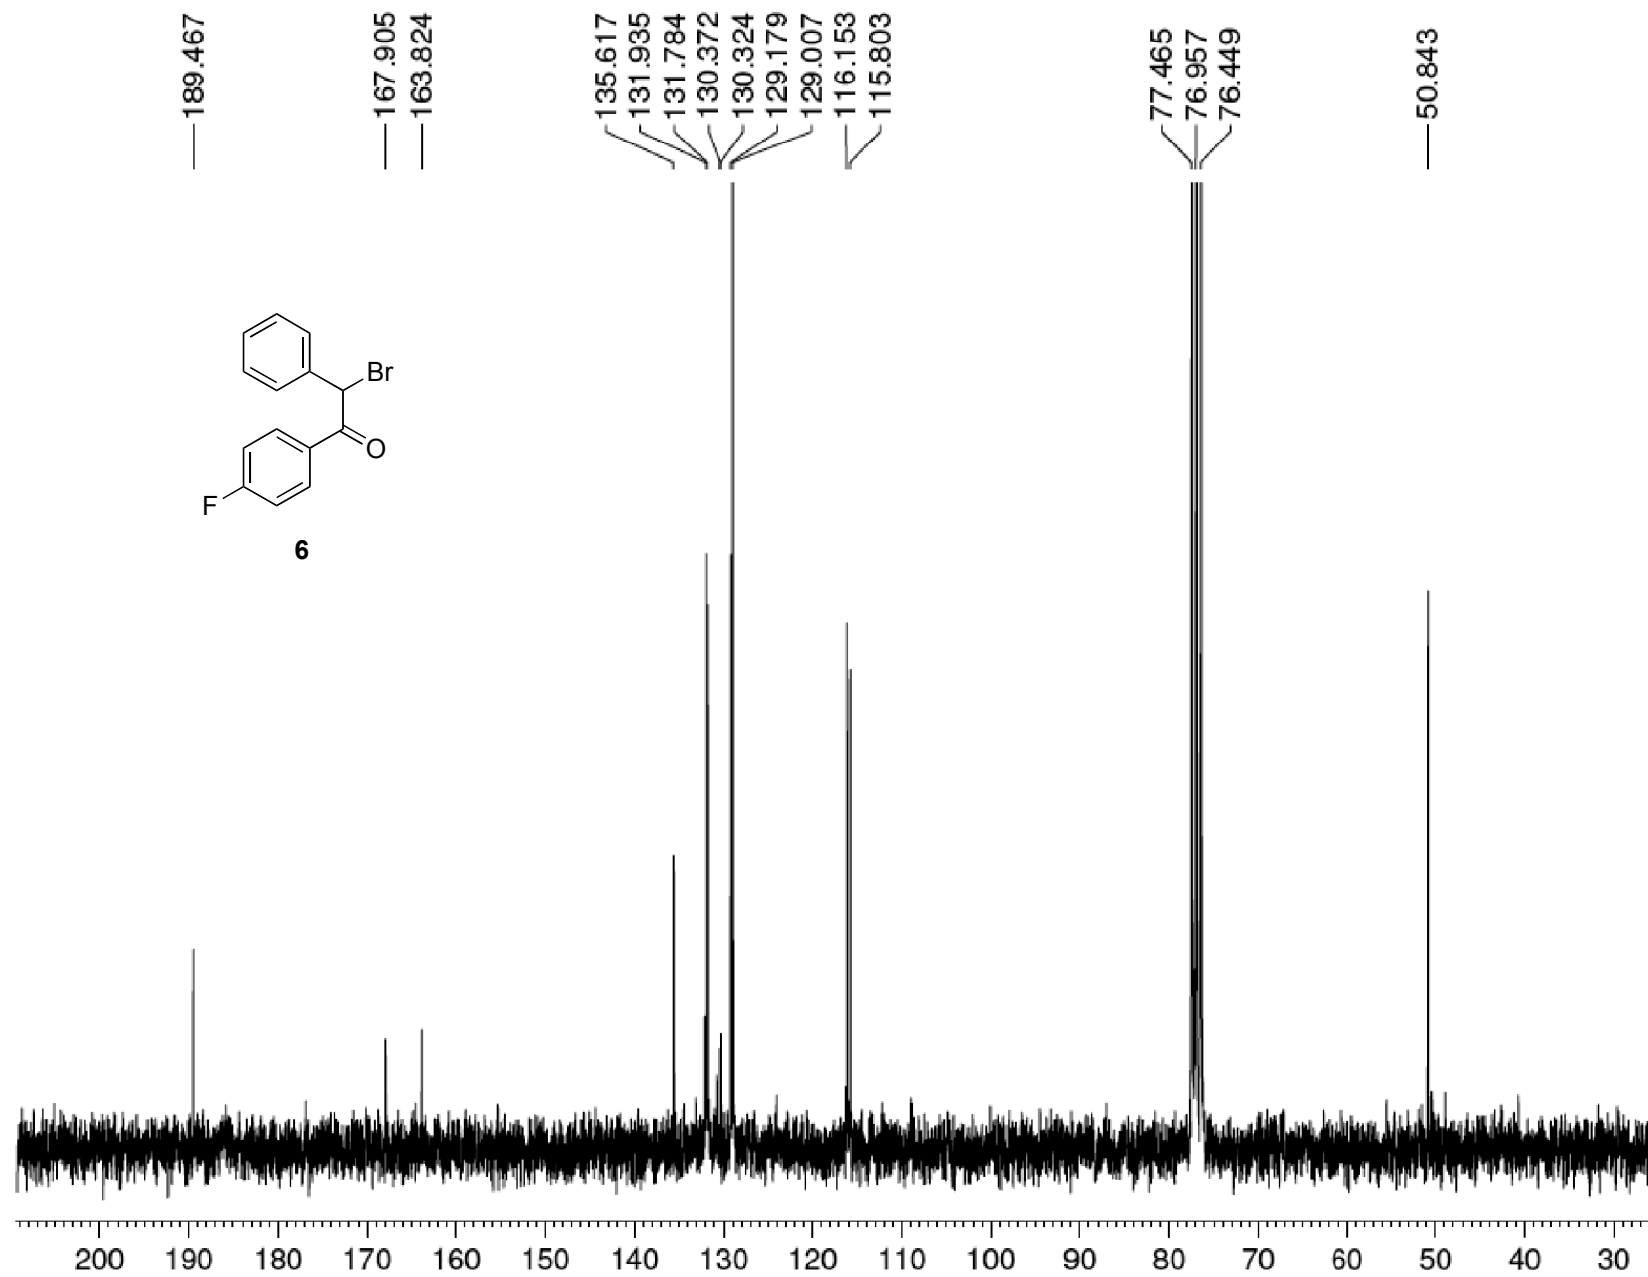

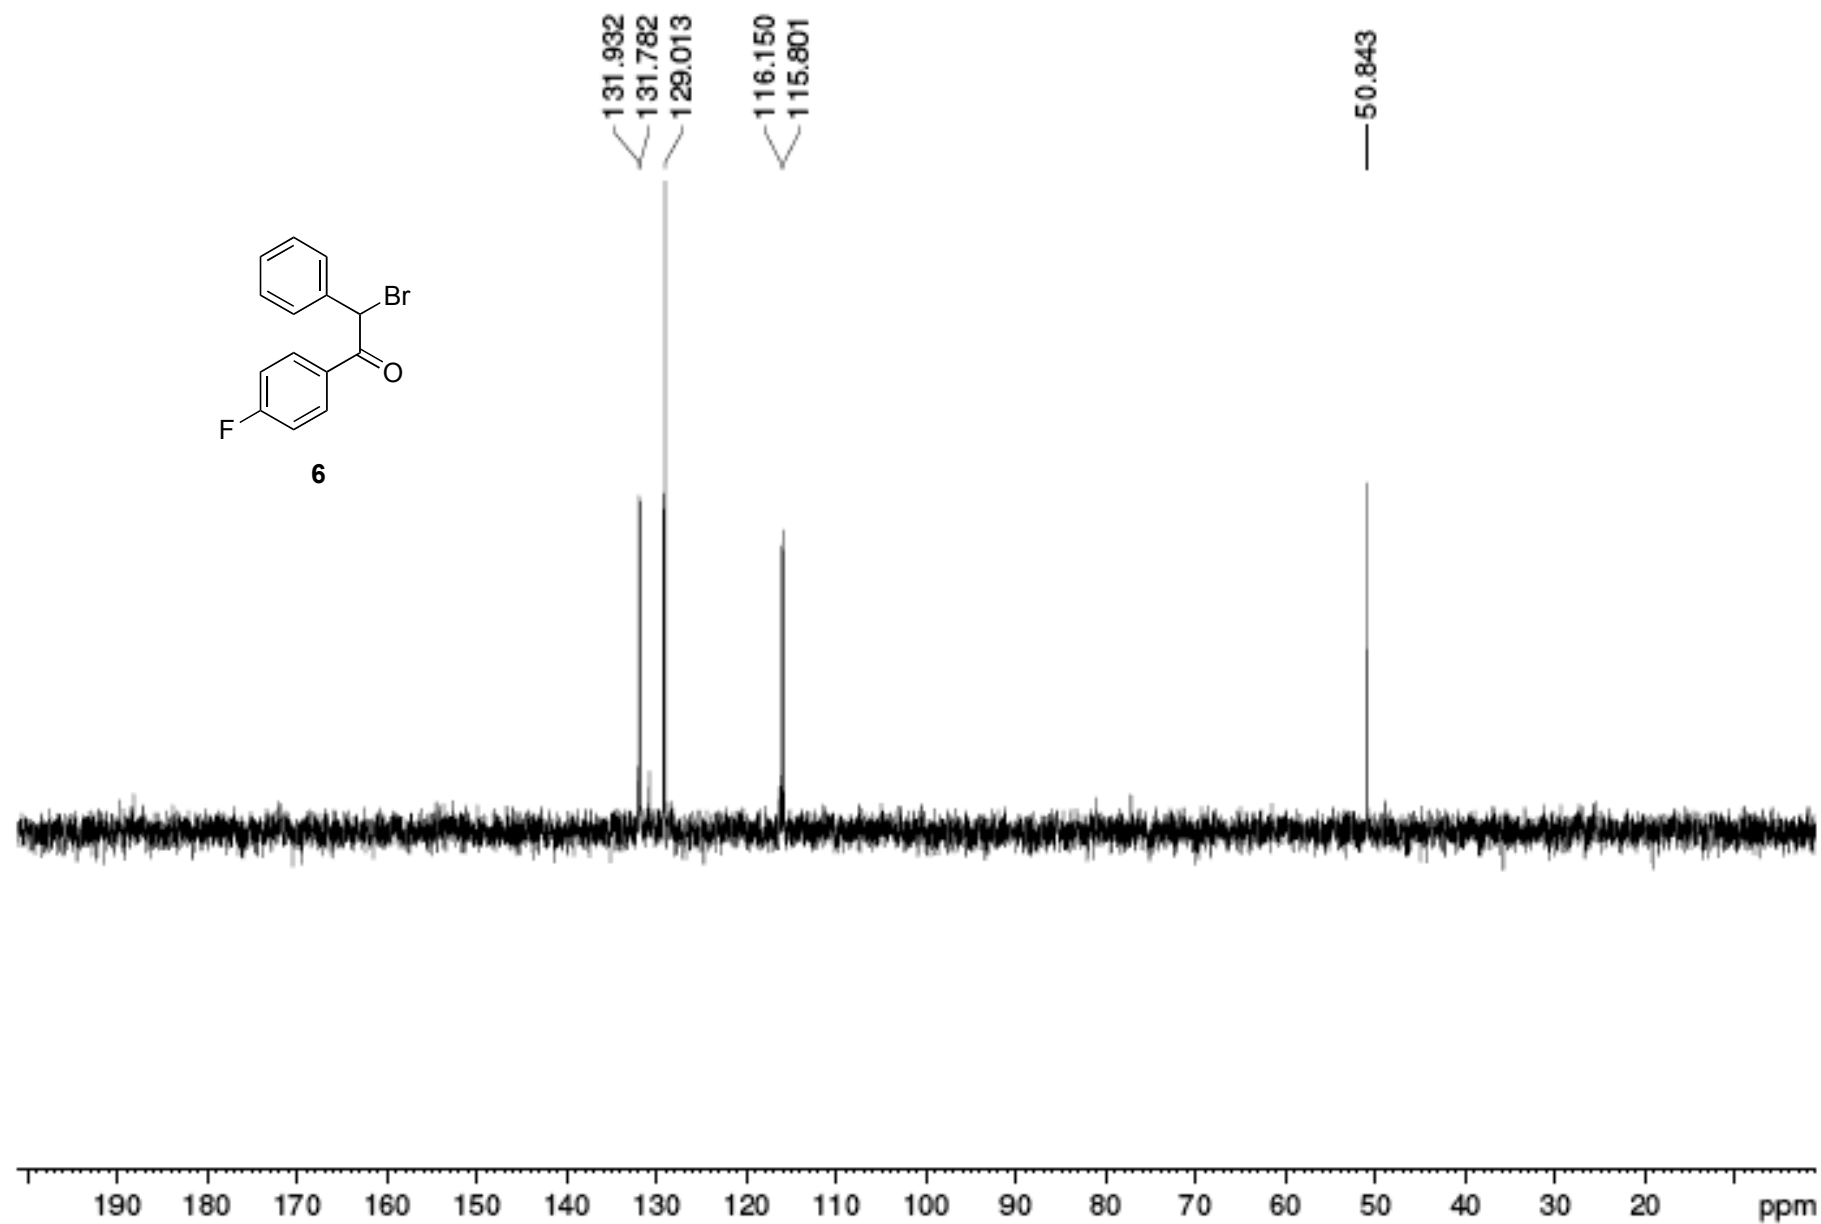

DEPT-135 spectrum of compound **6**



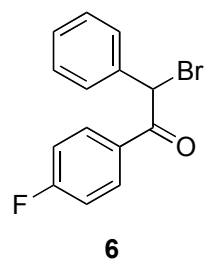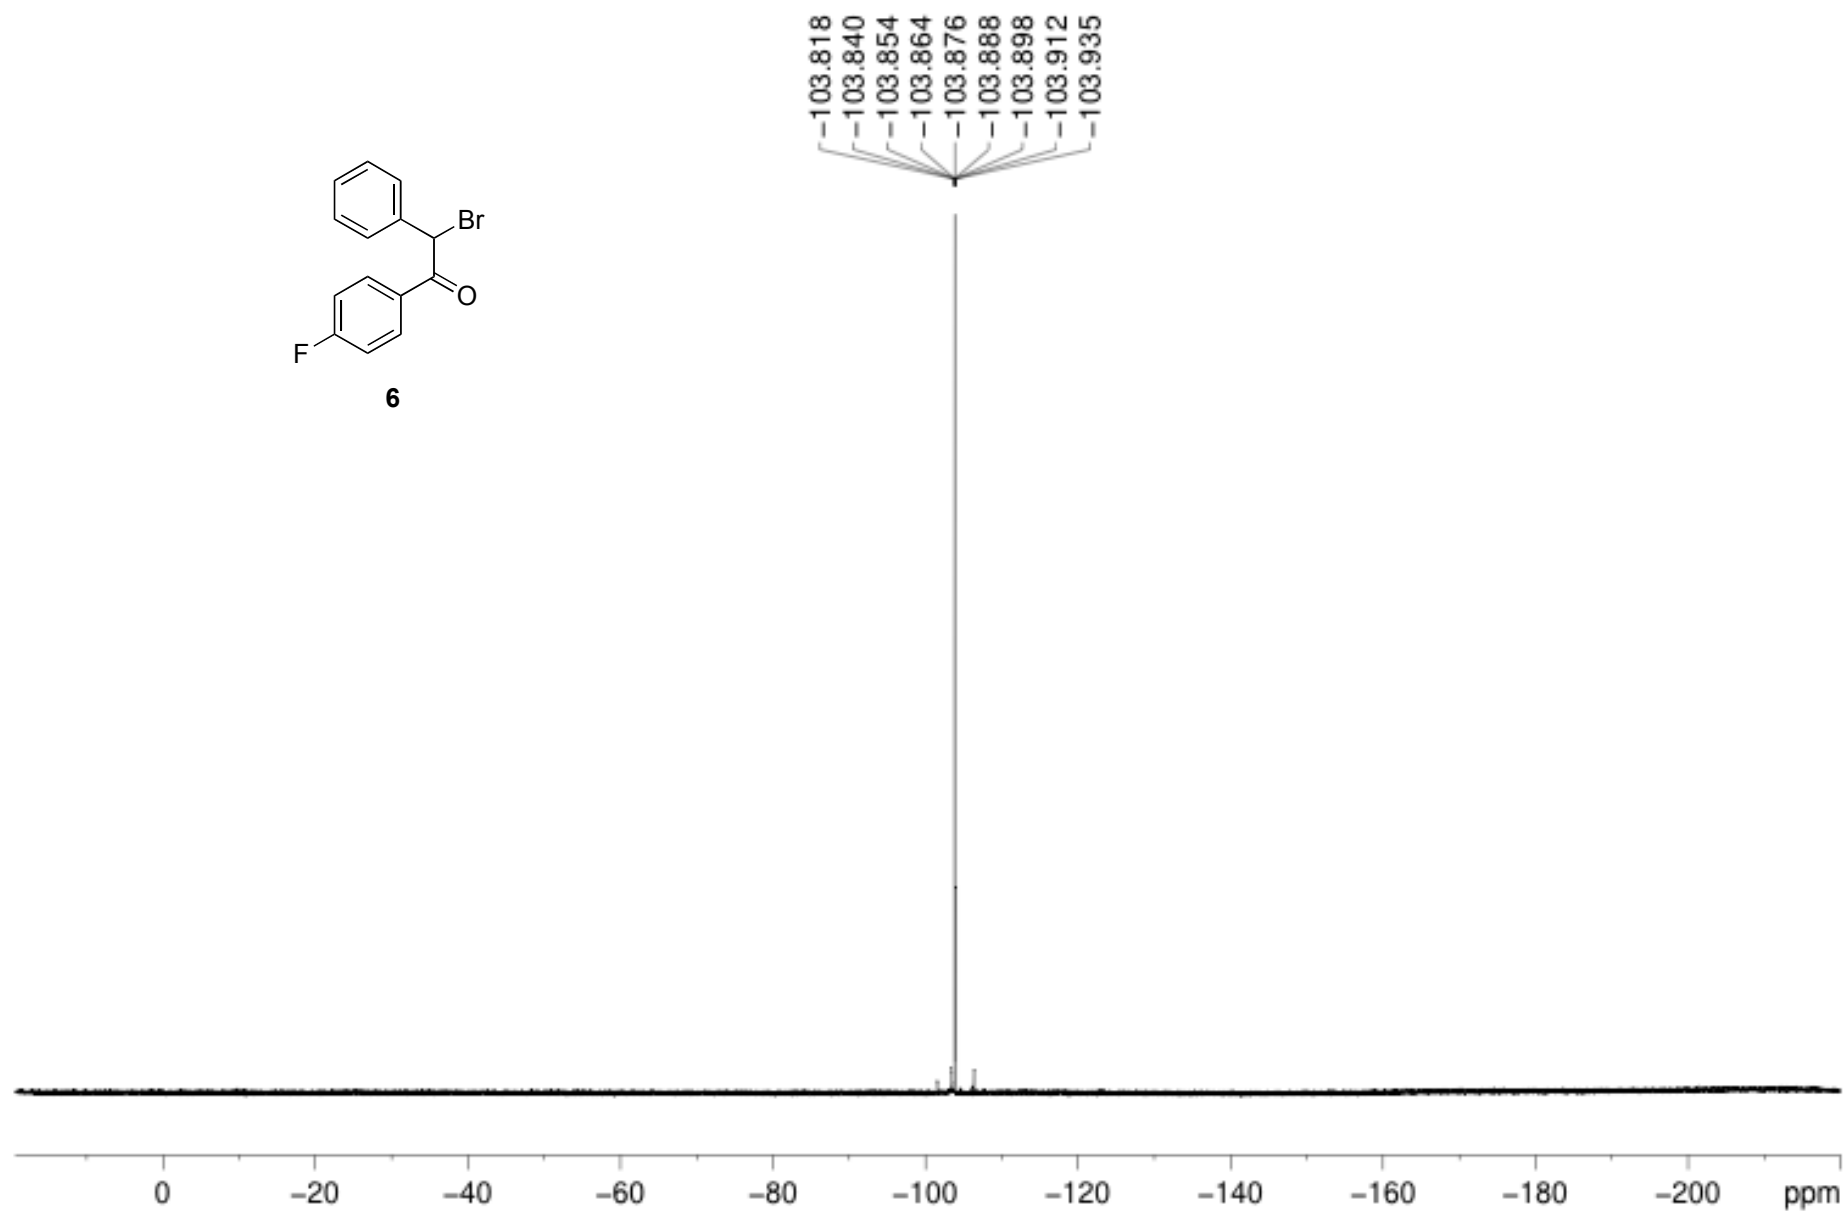

$^{19}\text{F}$  NMR spectrum of compound **6**

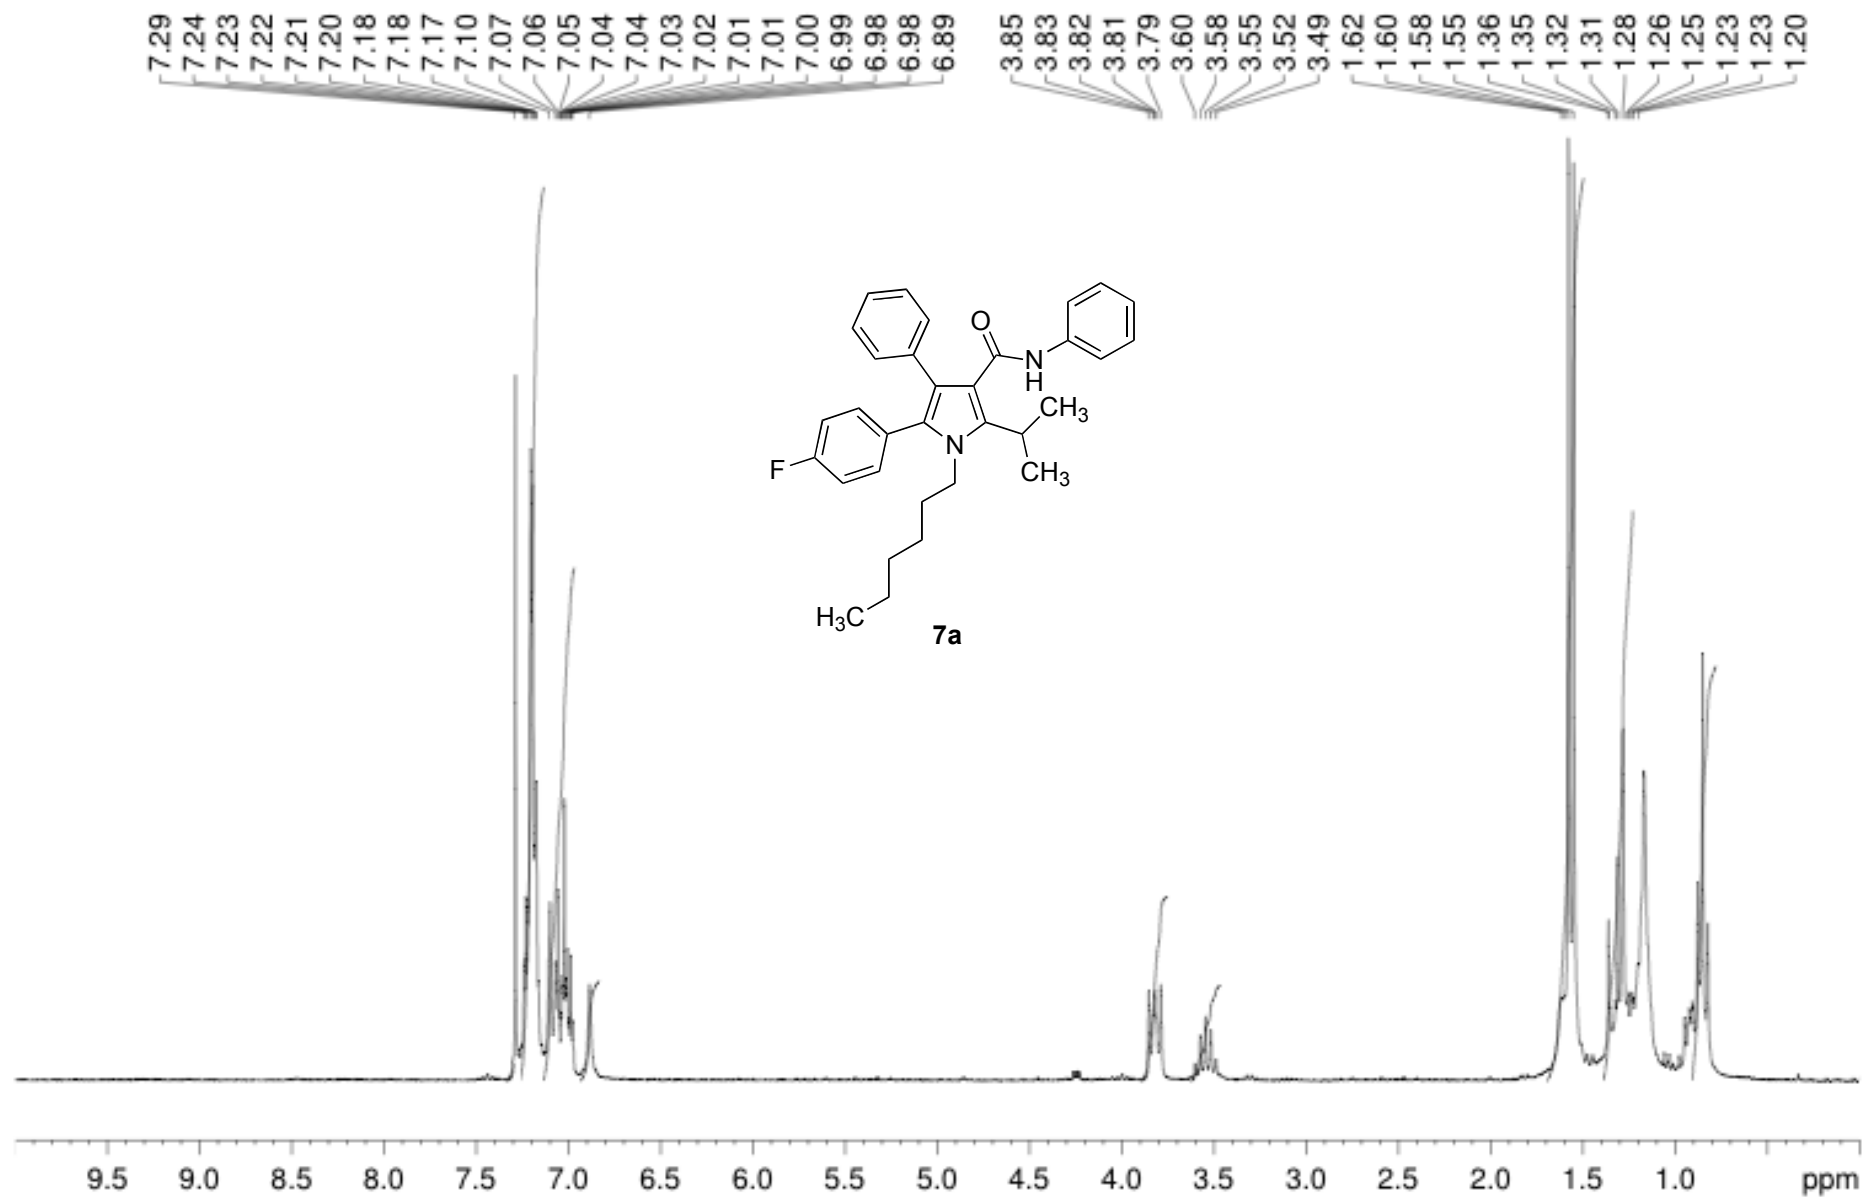

$^1\text{H}$  NMR spectrum of compound **7a**

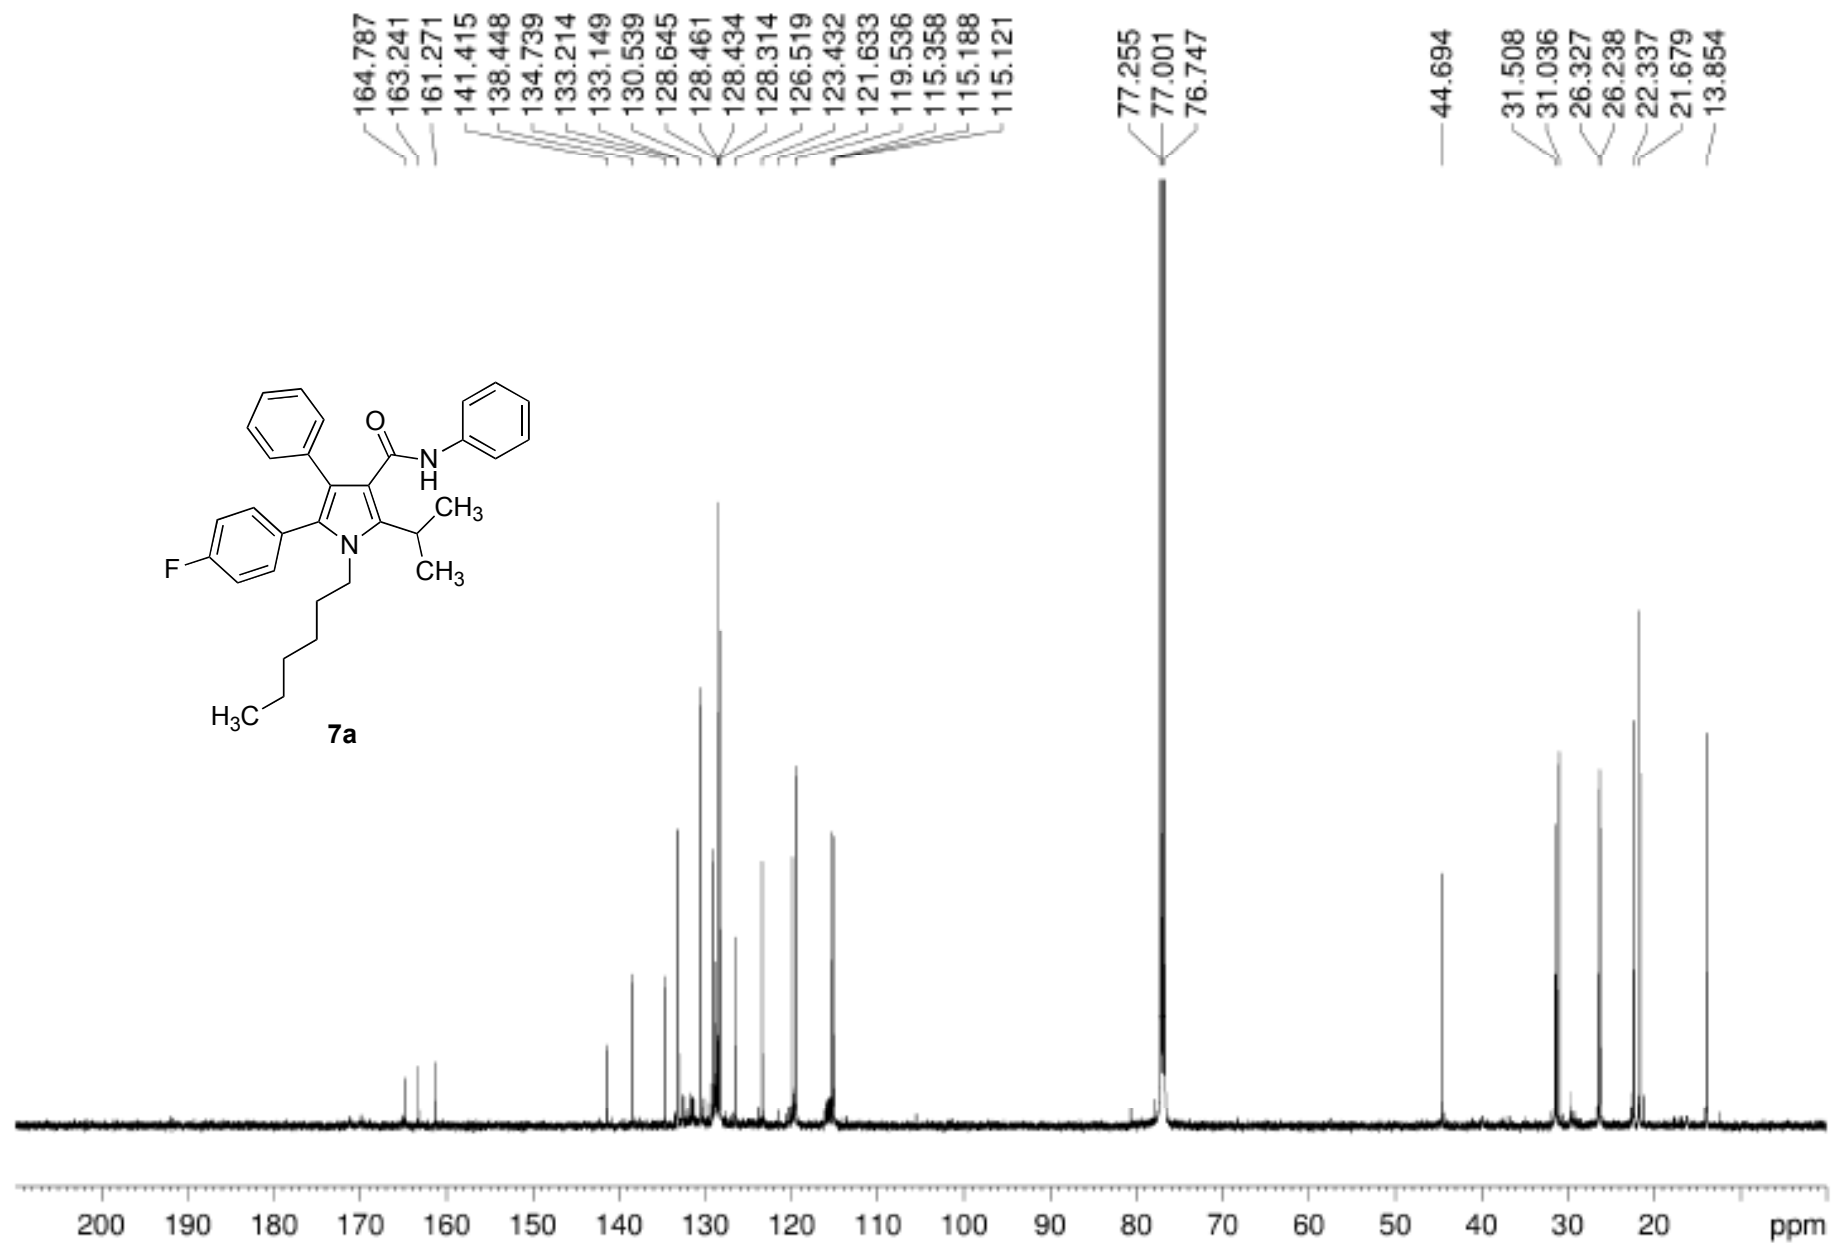

$^{13}\text{C}$  NMR spectrum of compound **7a**

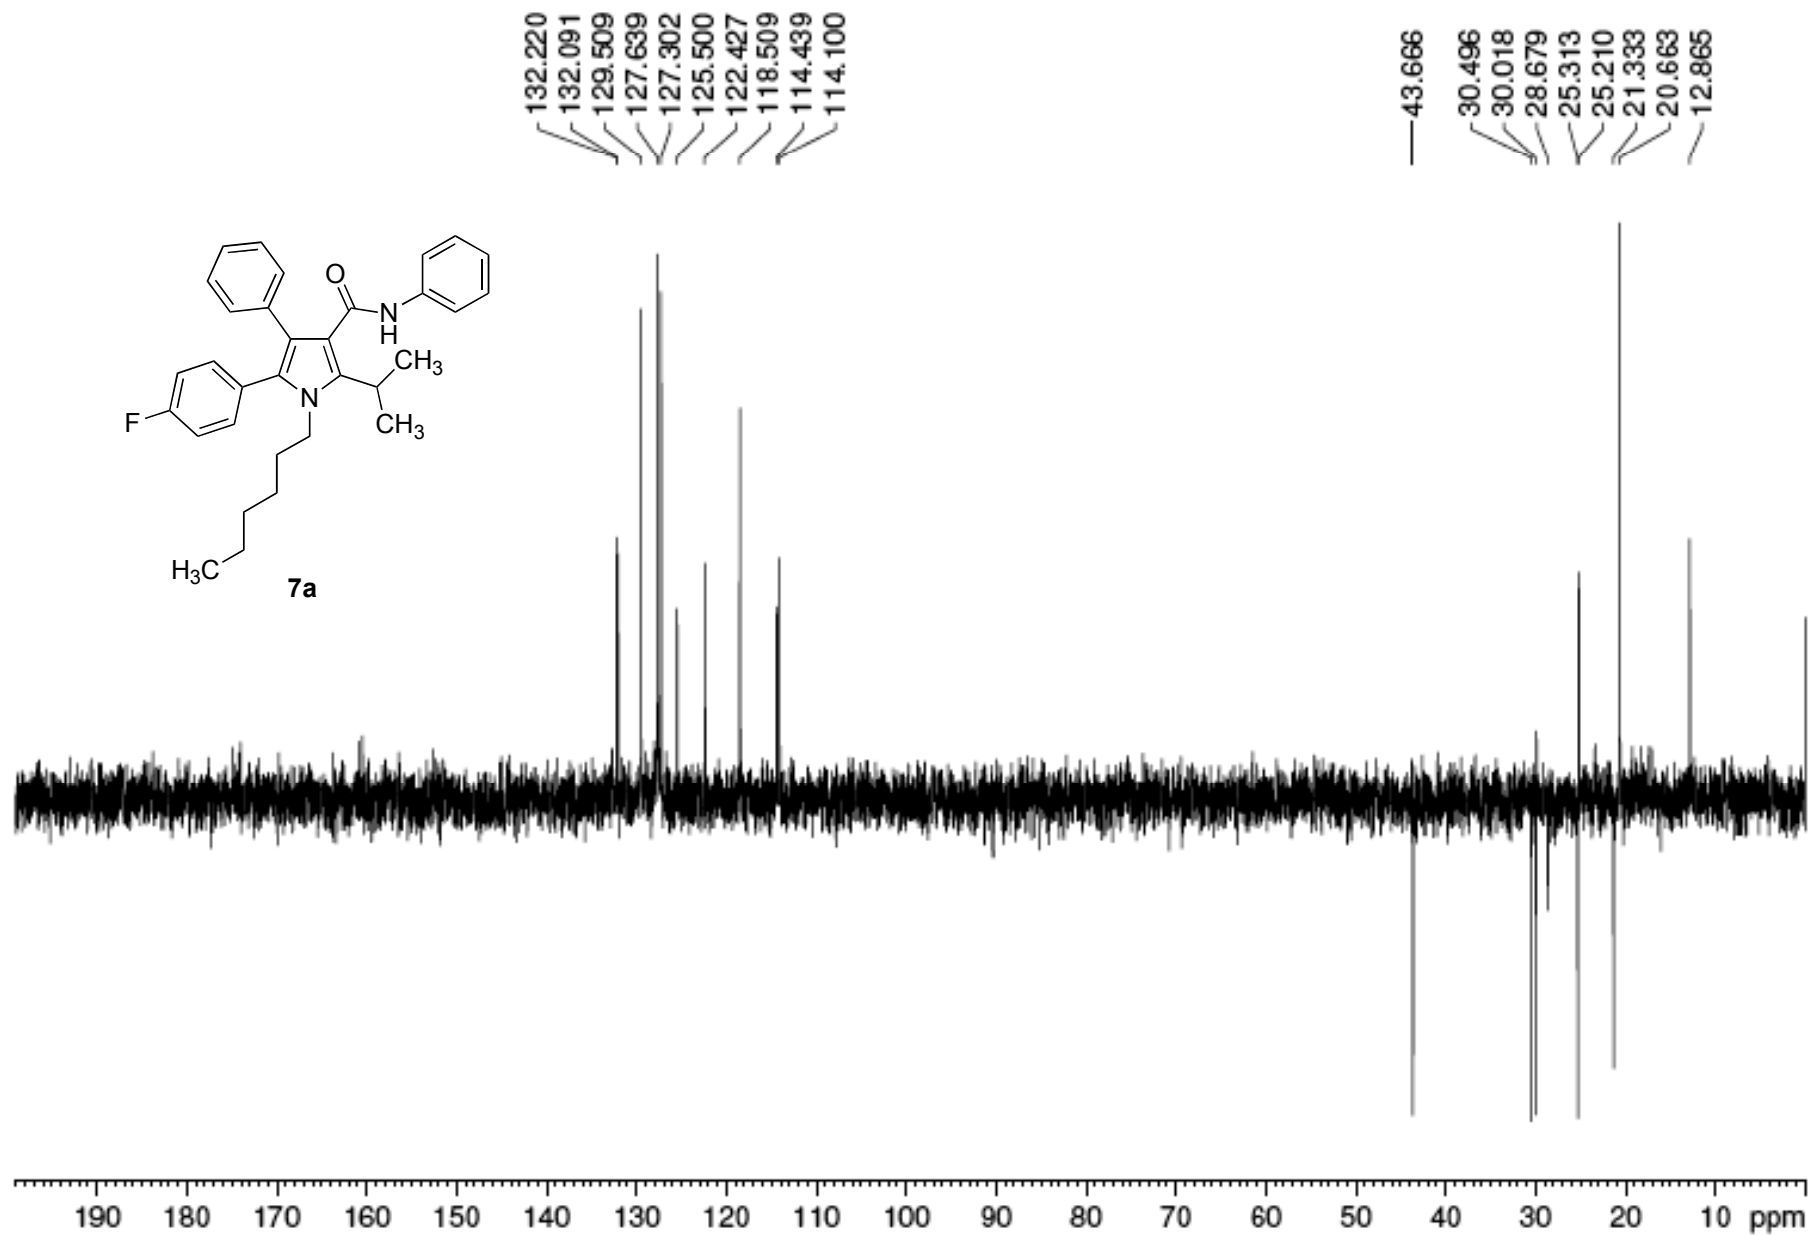

DEPT-135 spectrum of compound **7a**

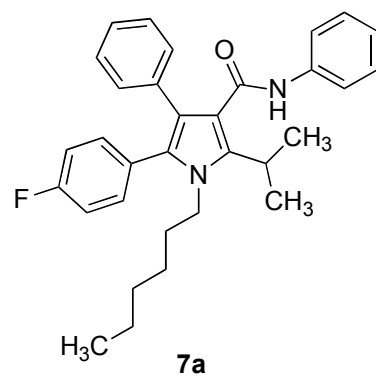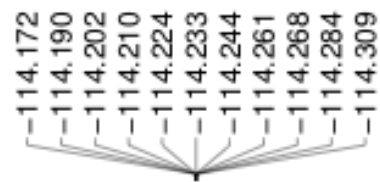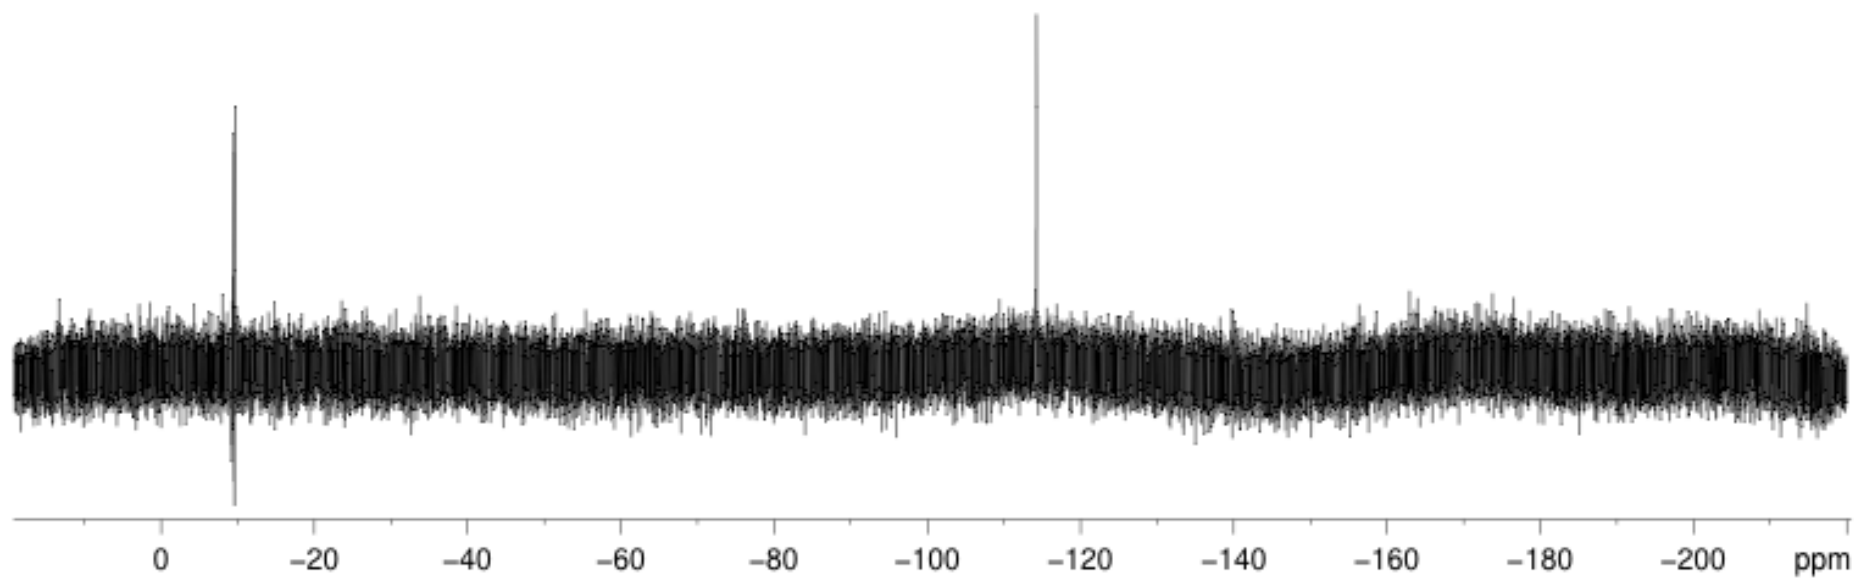

$^{19}\text{F}$  NMR spectrum of compound **7a**

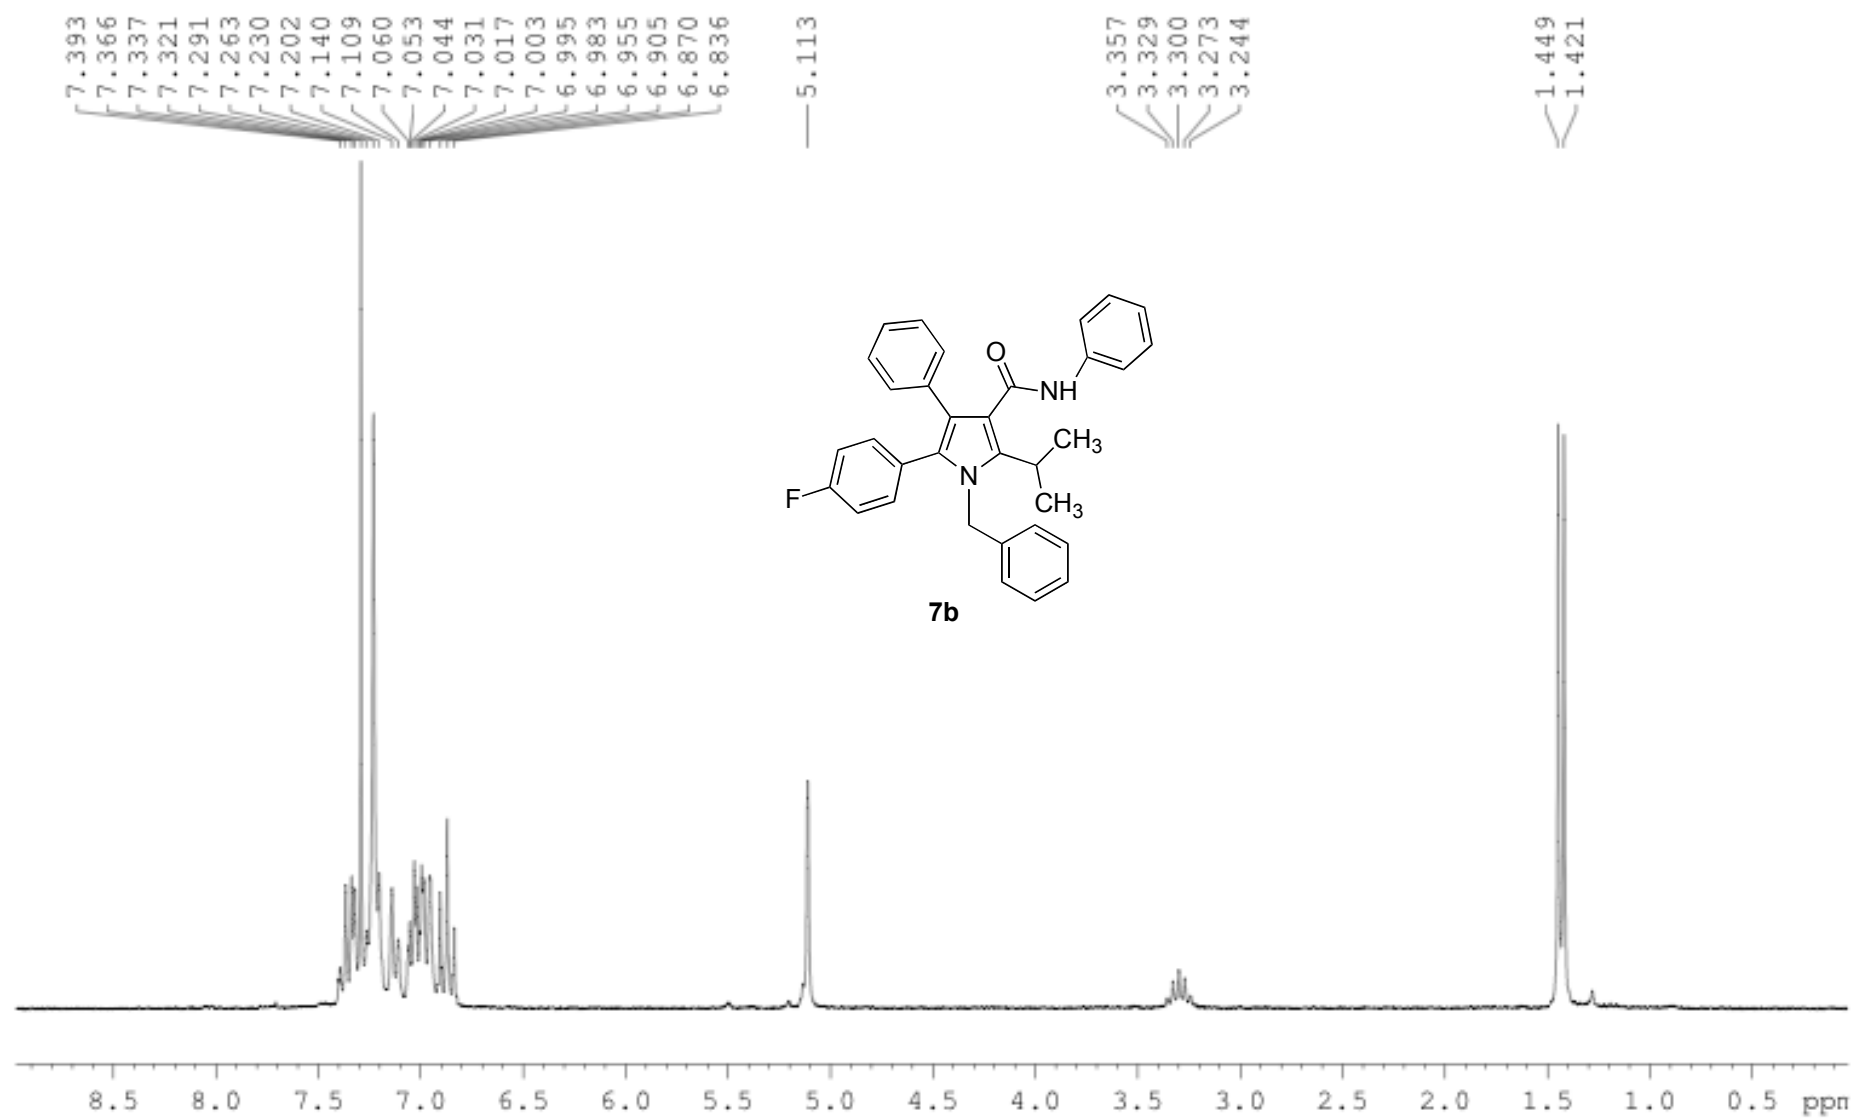

<sup>1</sup>H NMR spectrum of compound **7b**

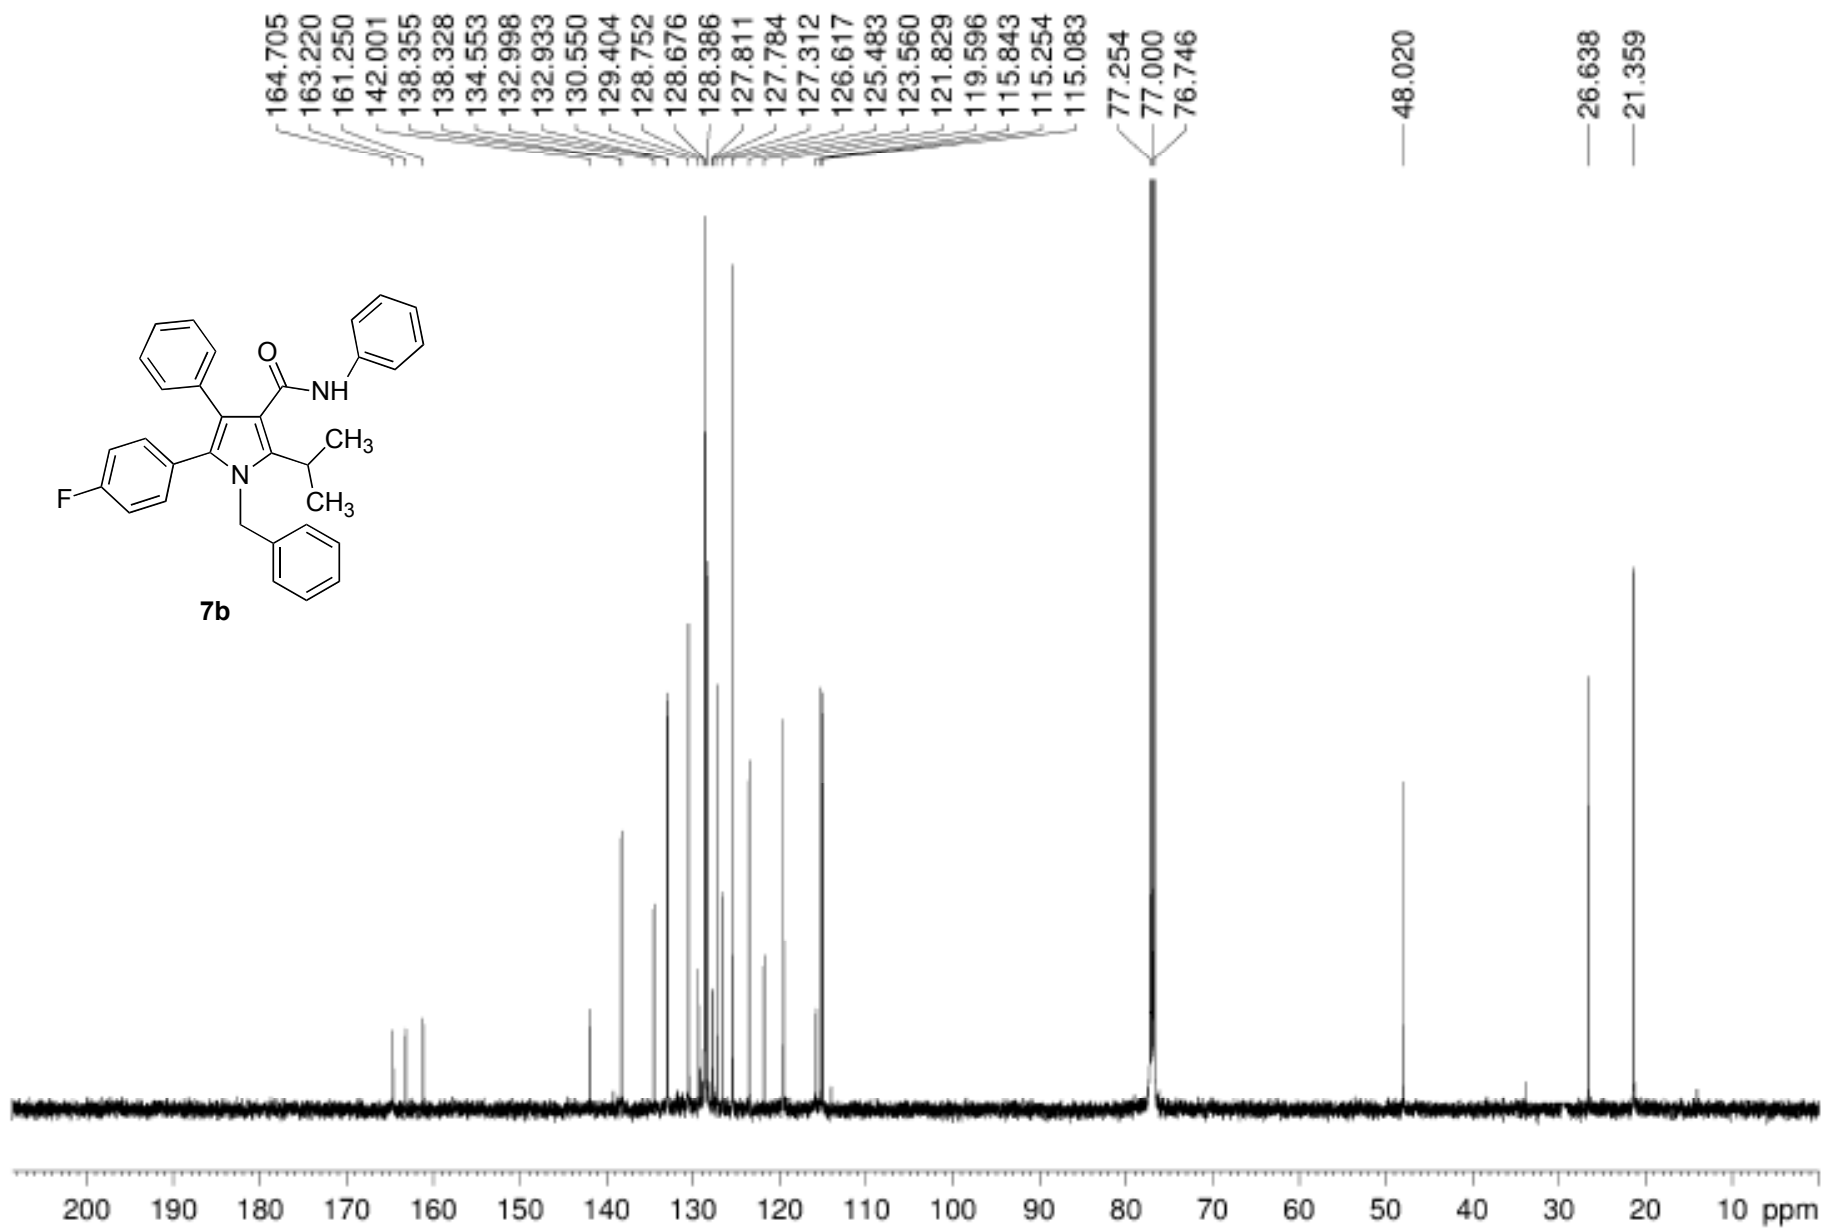

$^{13}\text{C}$  NMR spectrum of compound **7b**

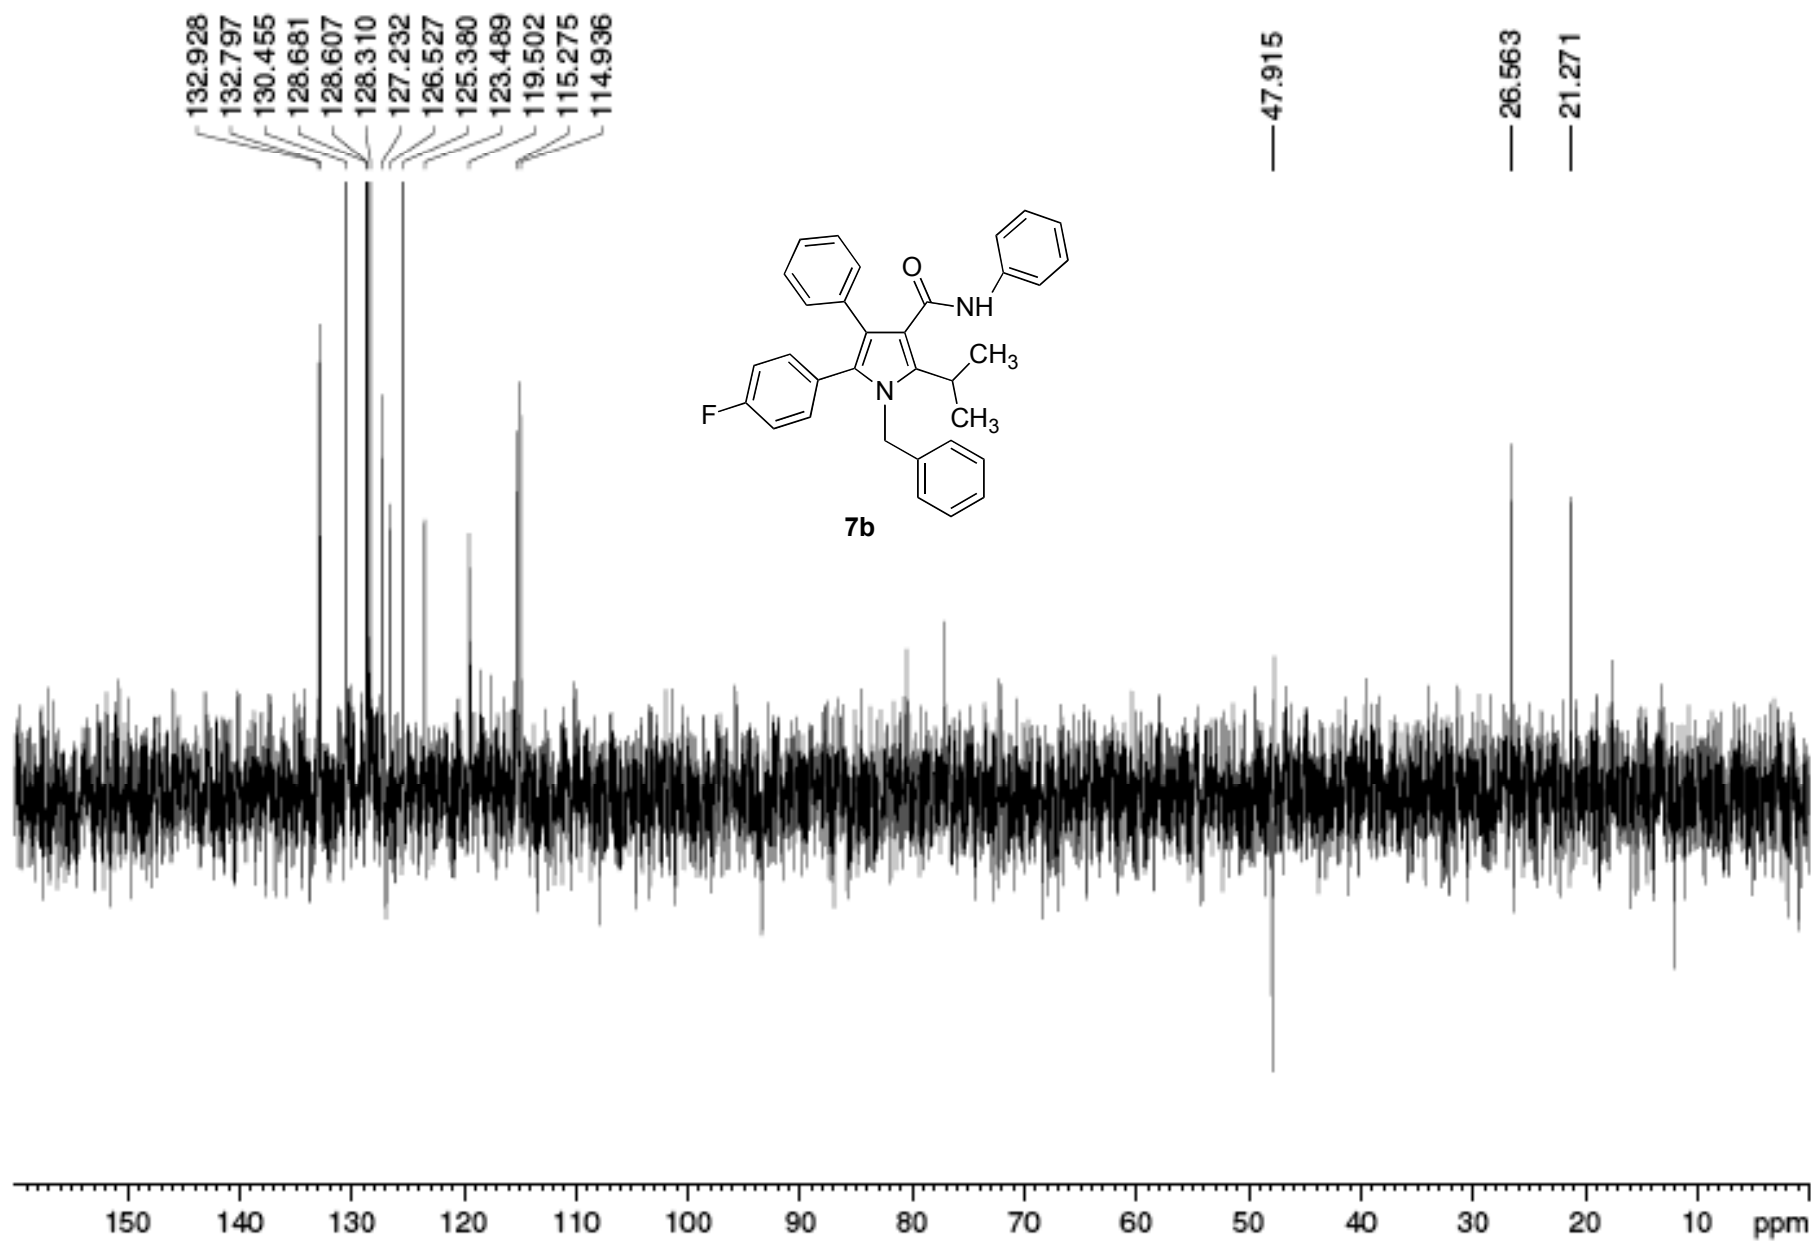

DEPT-135 spectrum of compound **7b**



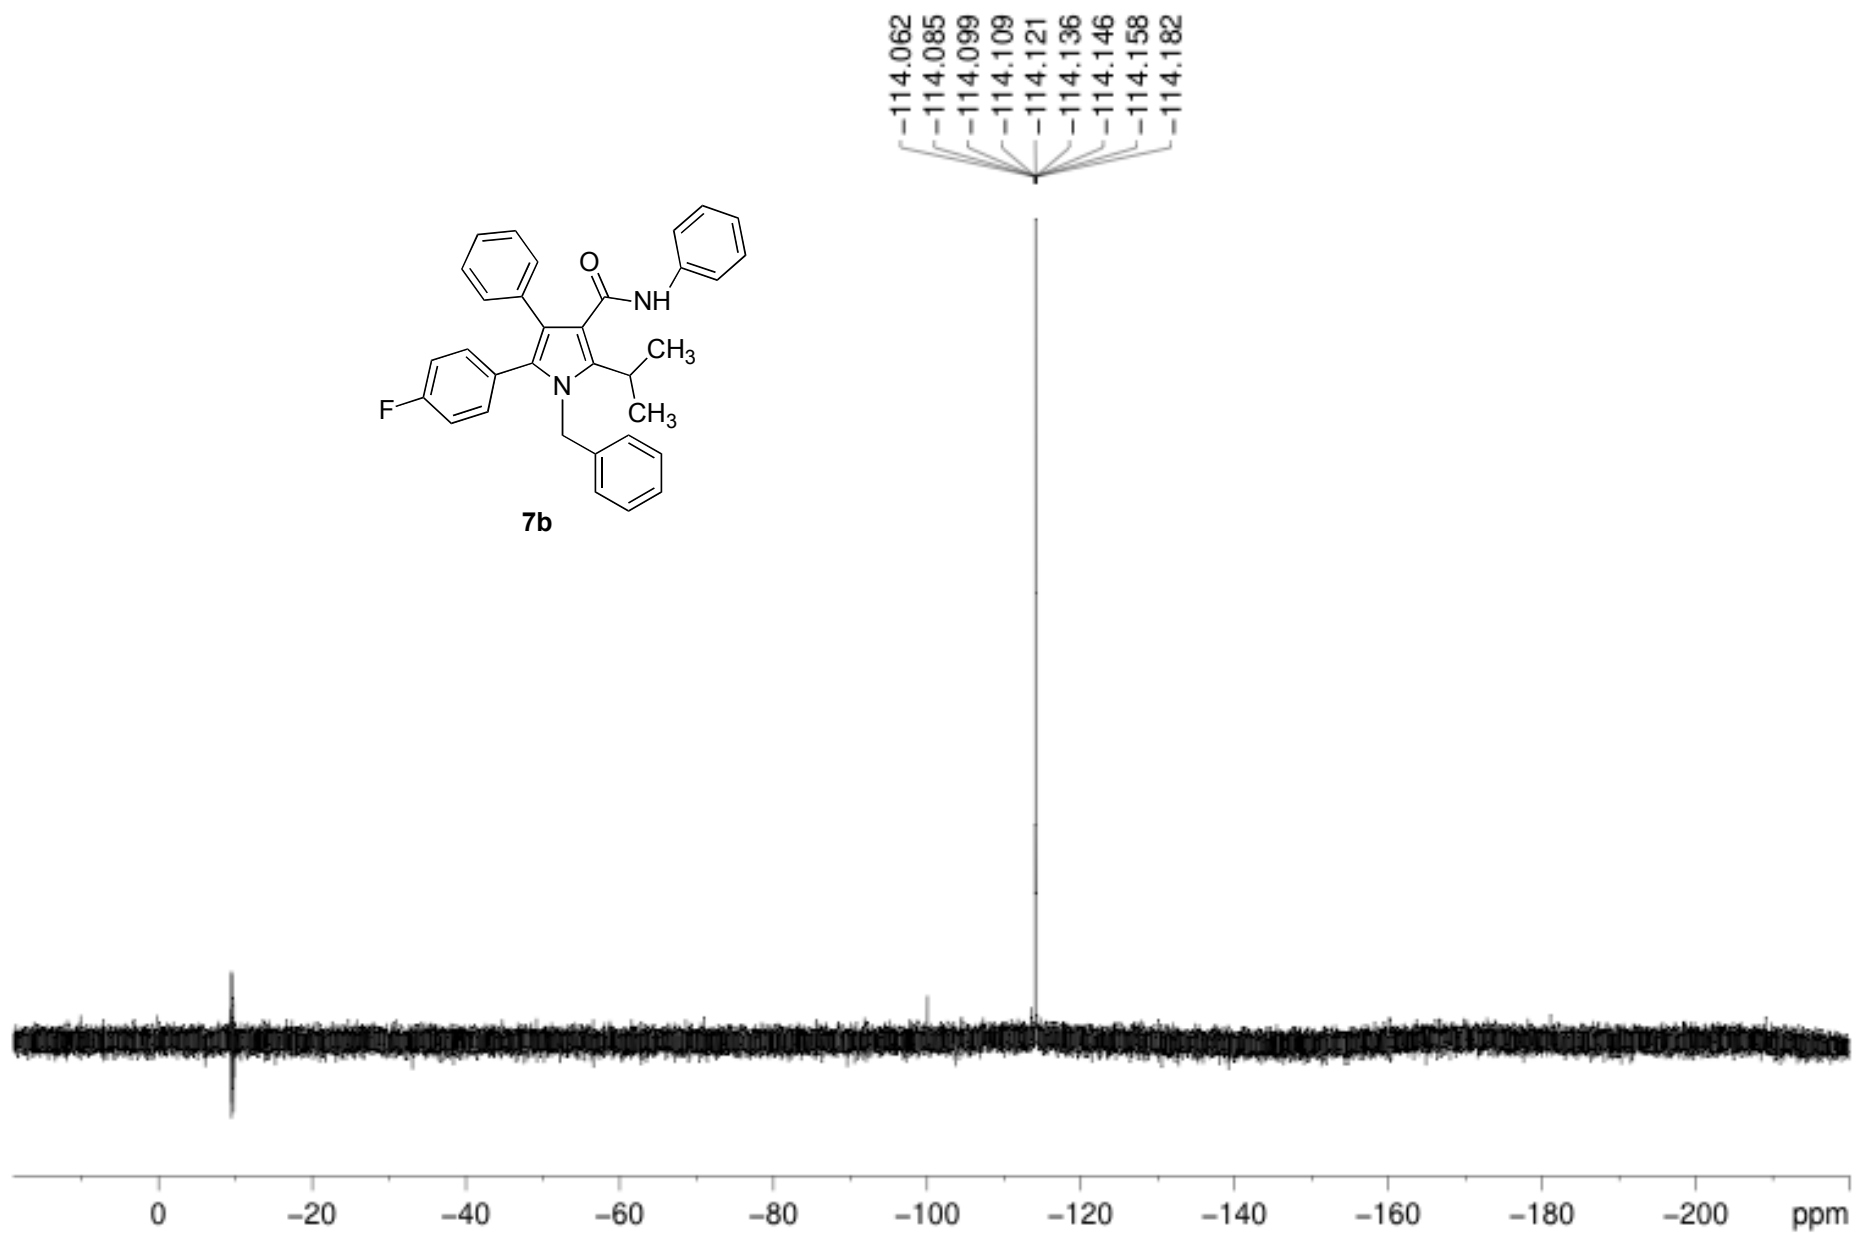

$^{19}\text{F}$  NMR spectrum of compound **7b**

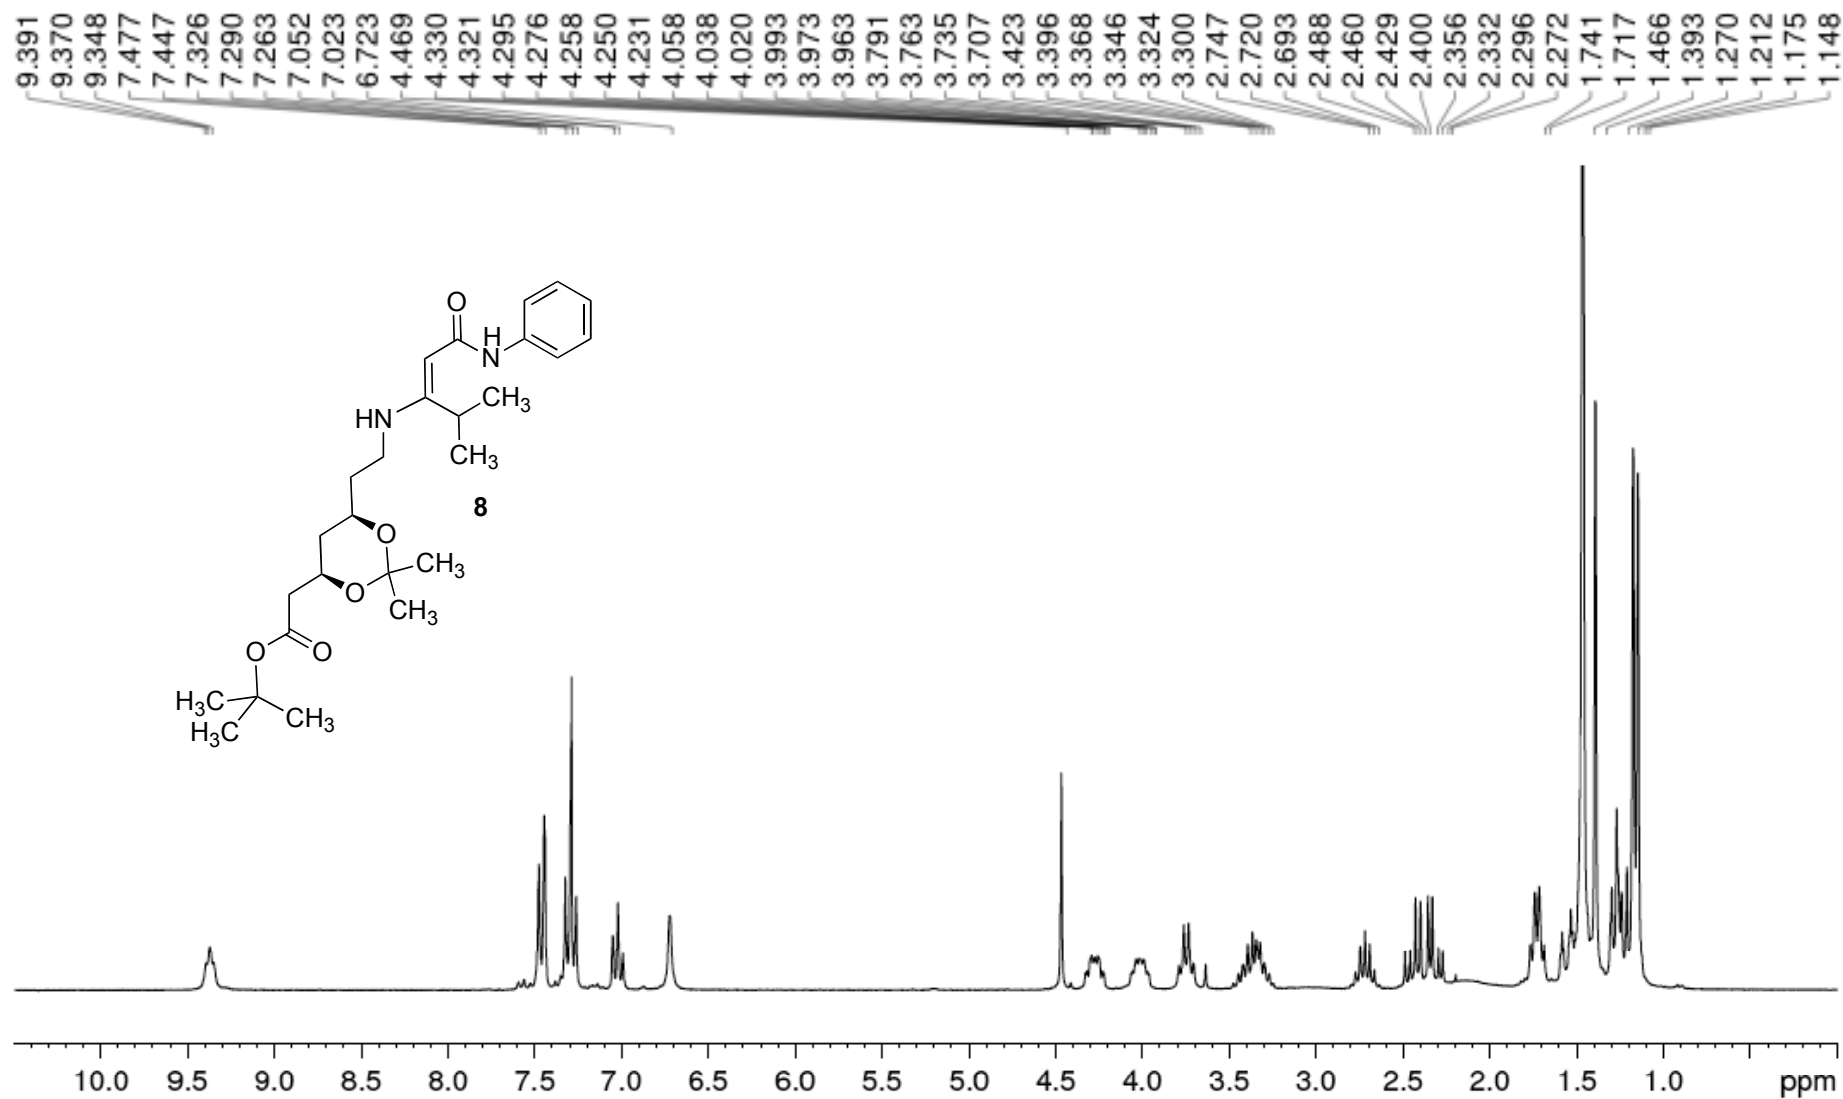

<sup>1</sup>H NMR spectrum of compound **8**

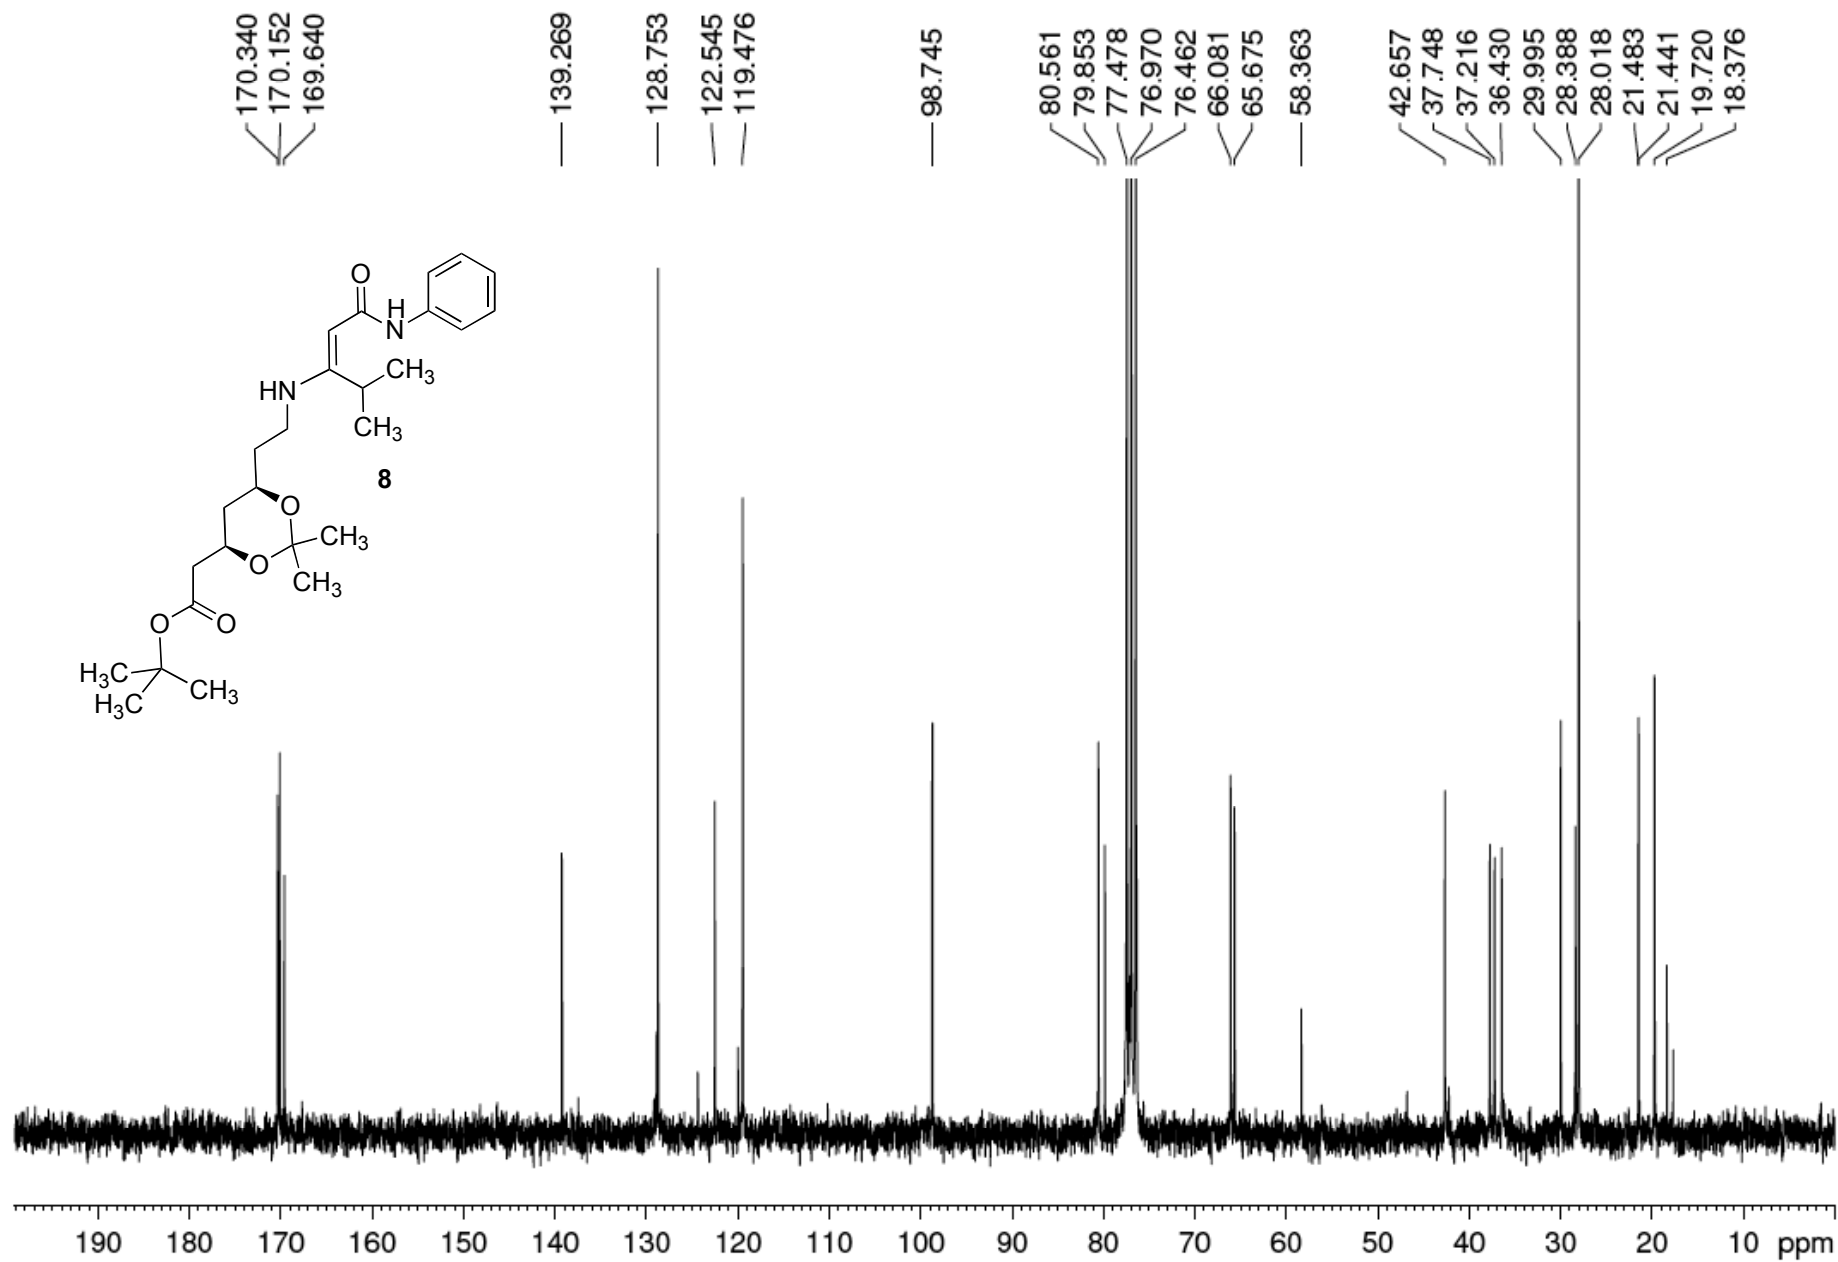

<sup>13</sup>C NMR spectrum of compound **8**

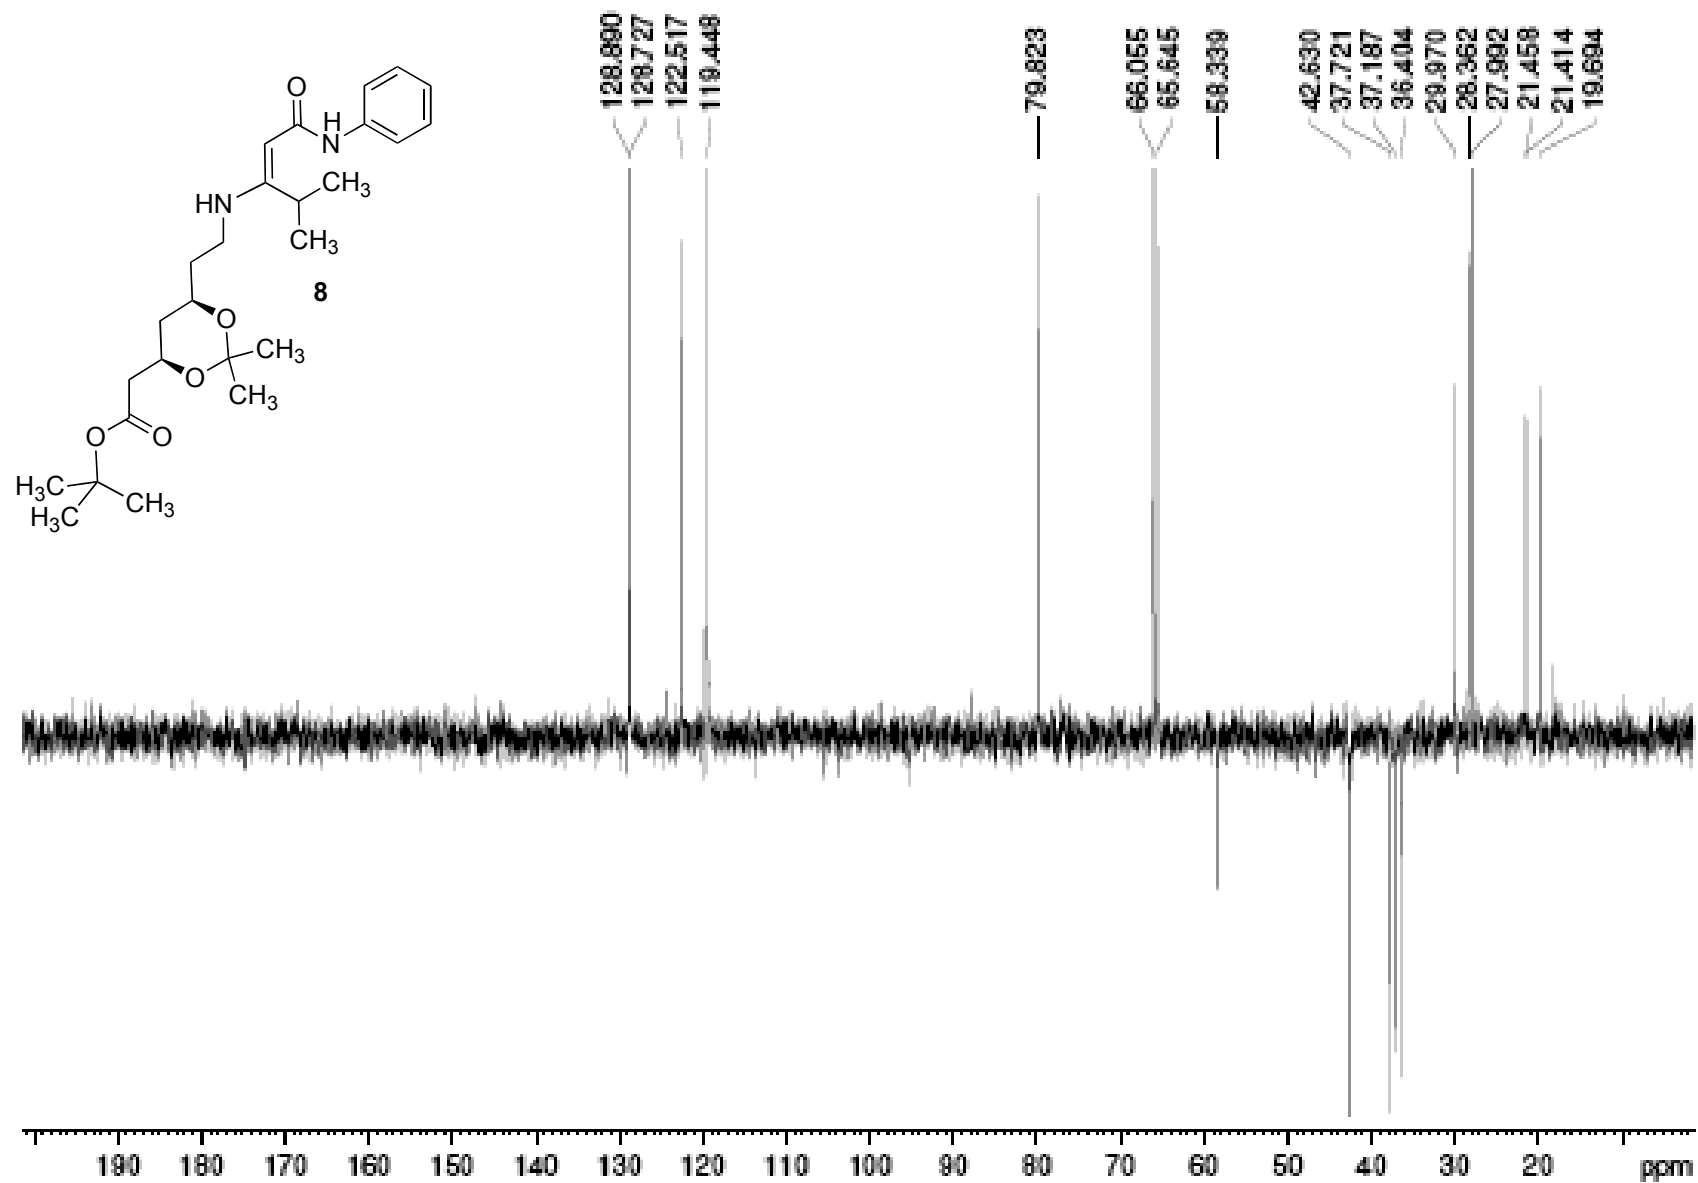

DEPT-135 spectrum of compound **8**

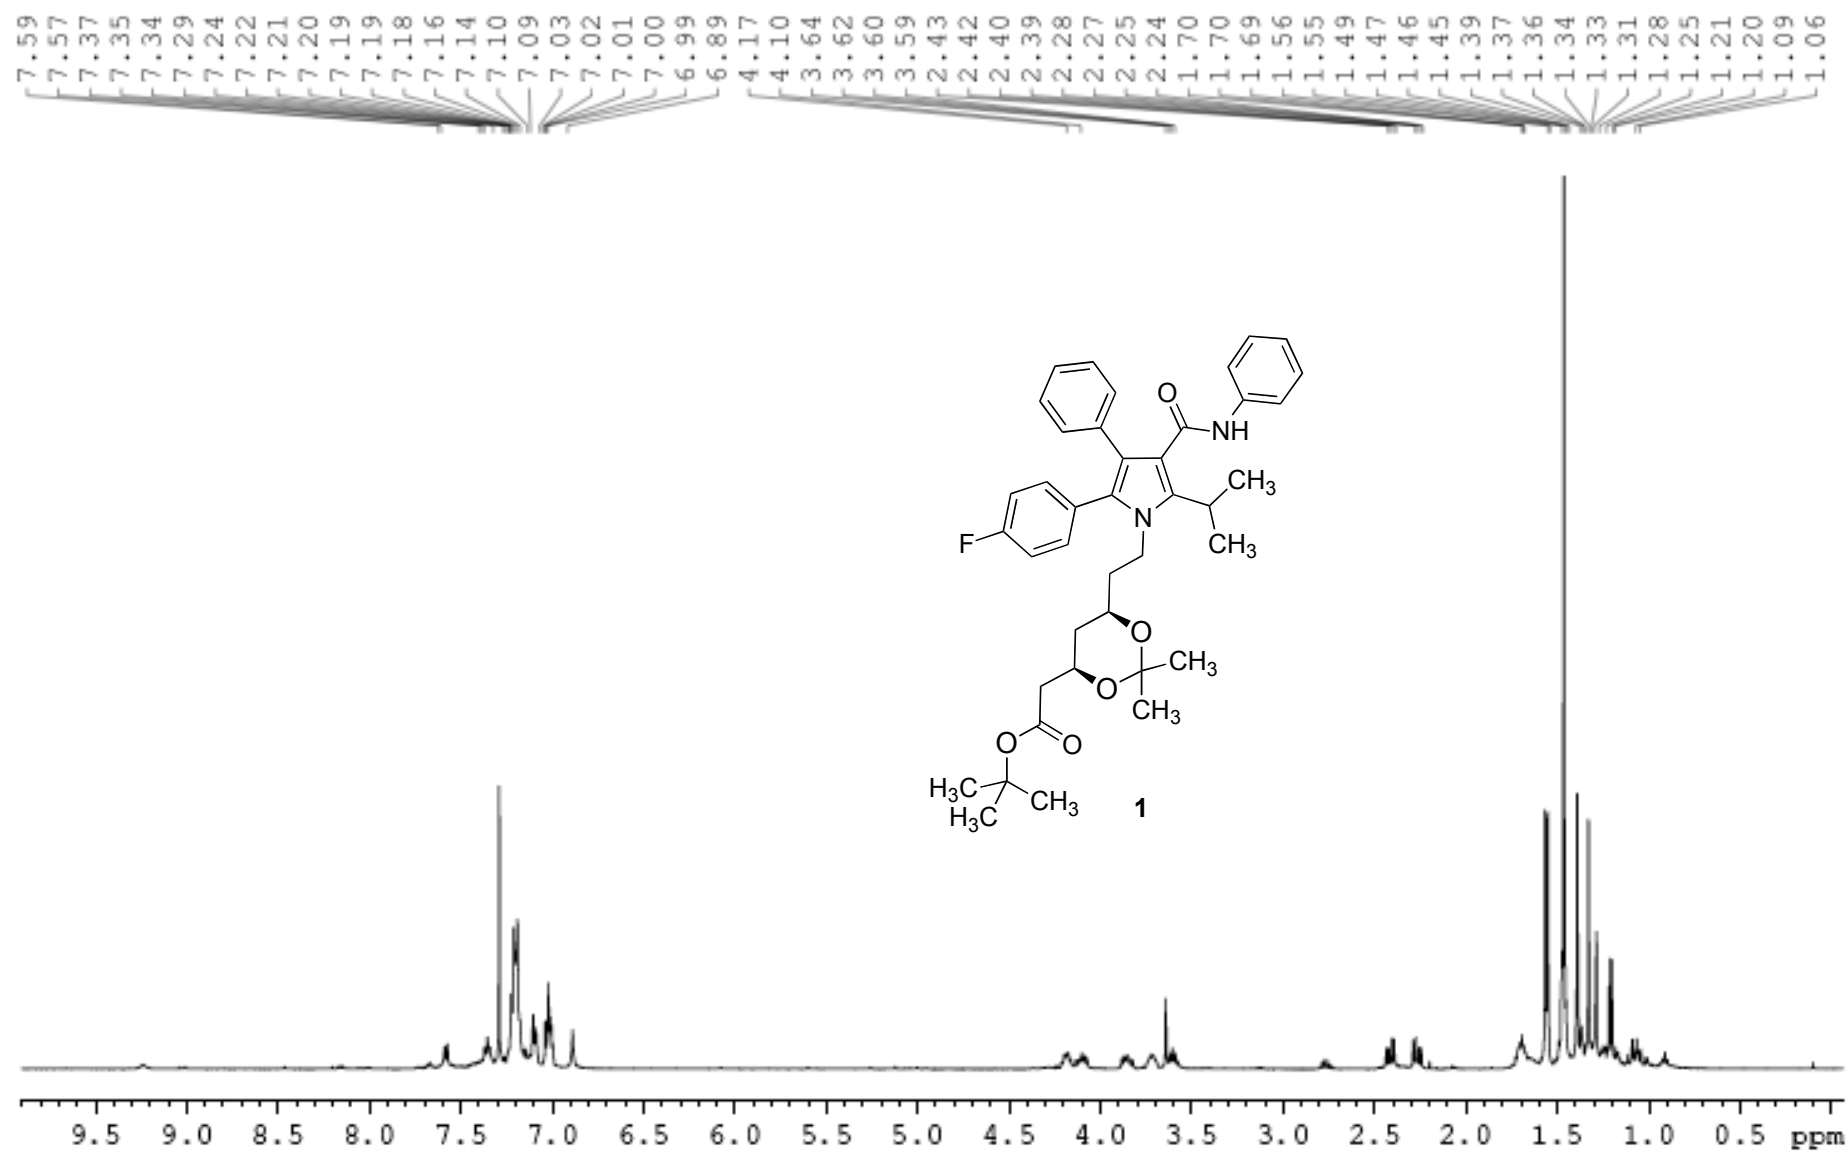

<sup>1</sup>H NMR spectrum of compound **1**

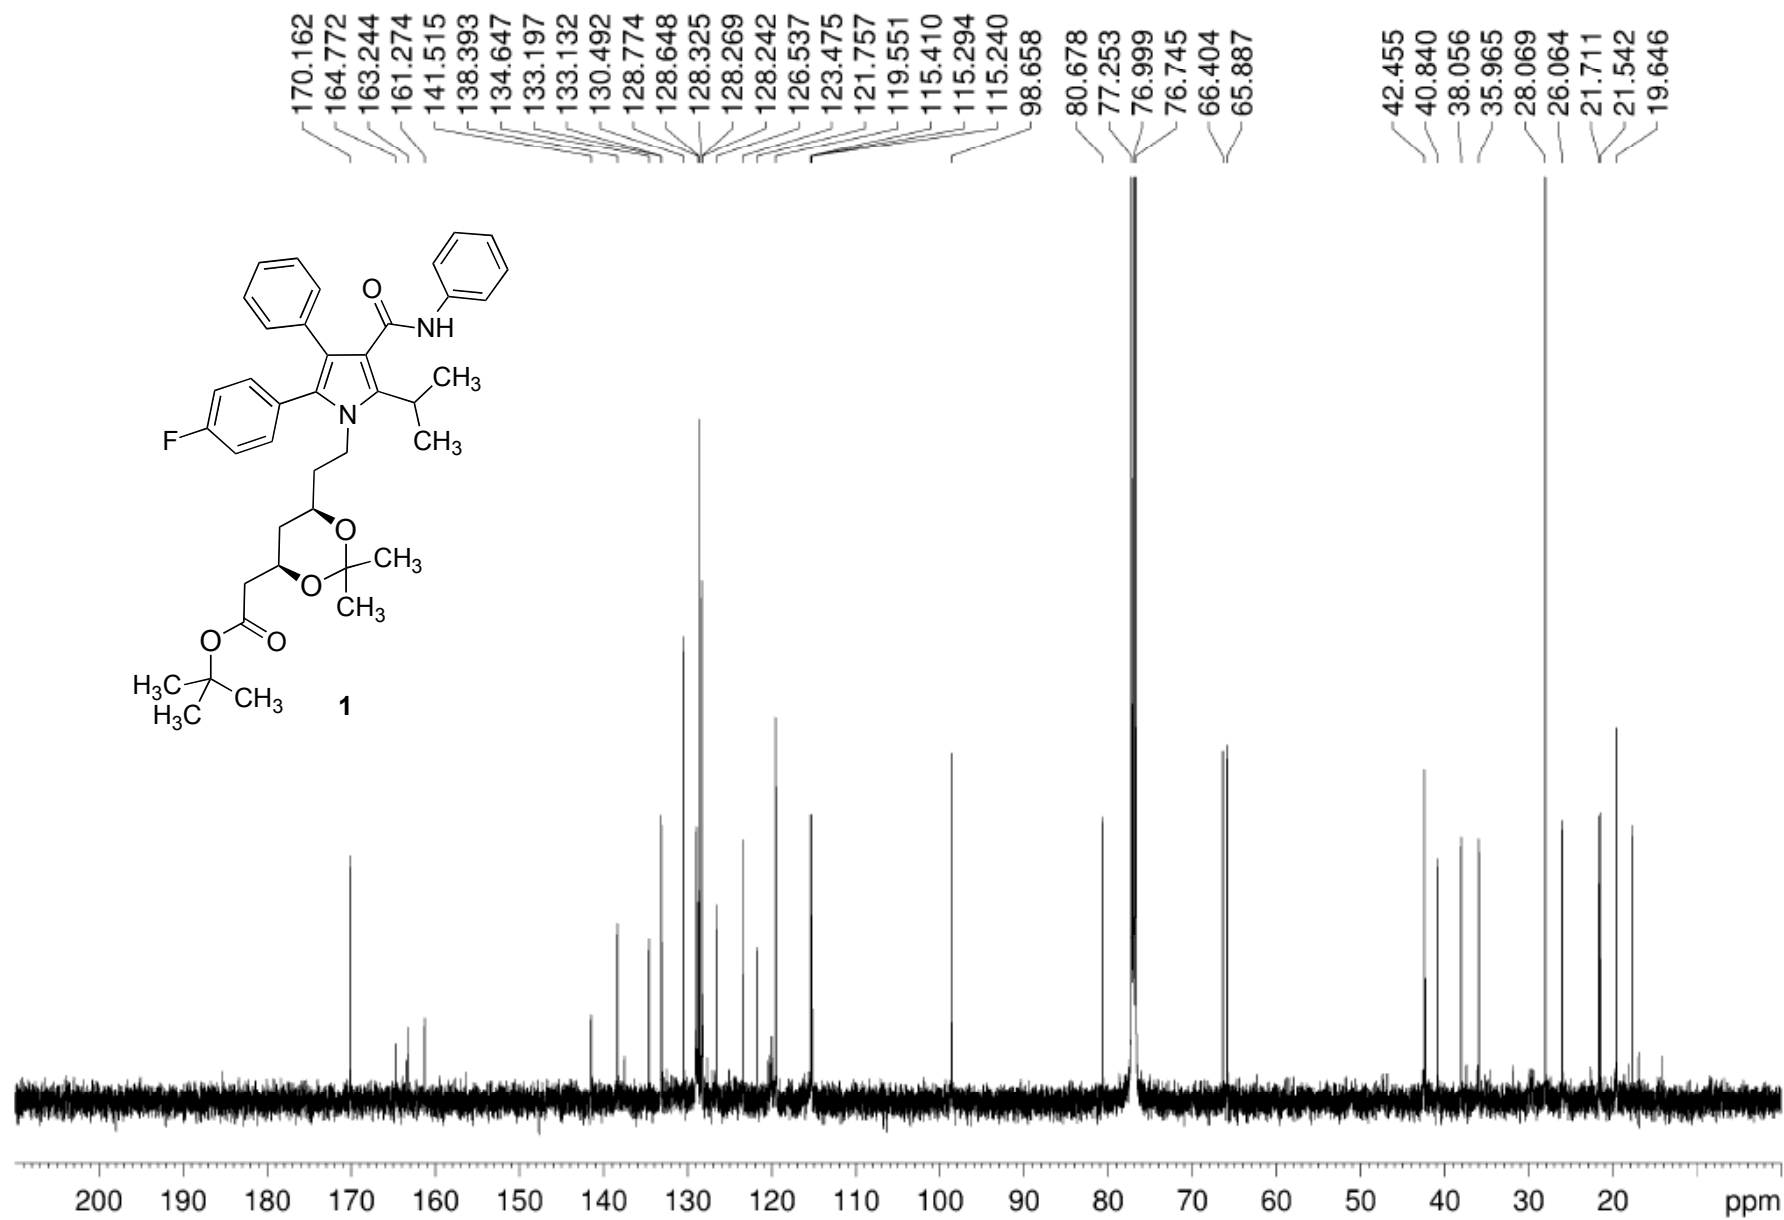

<sup>13</sup>C NMR spectrum of compound 1

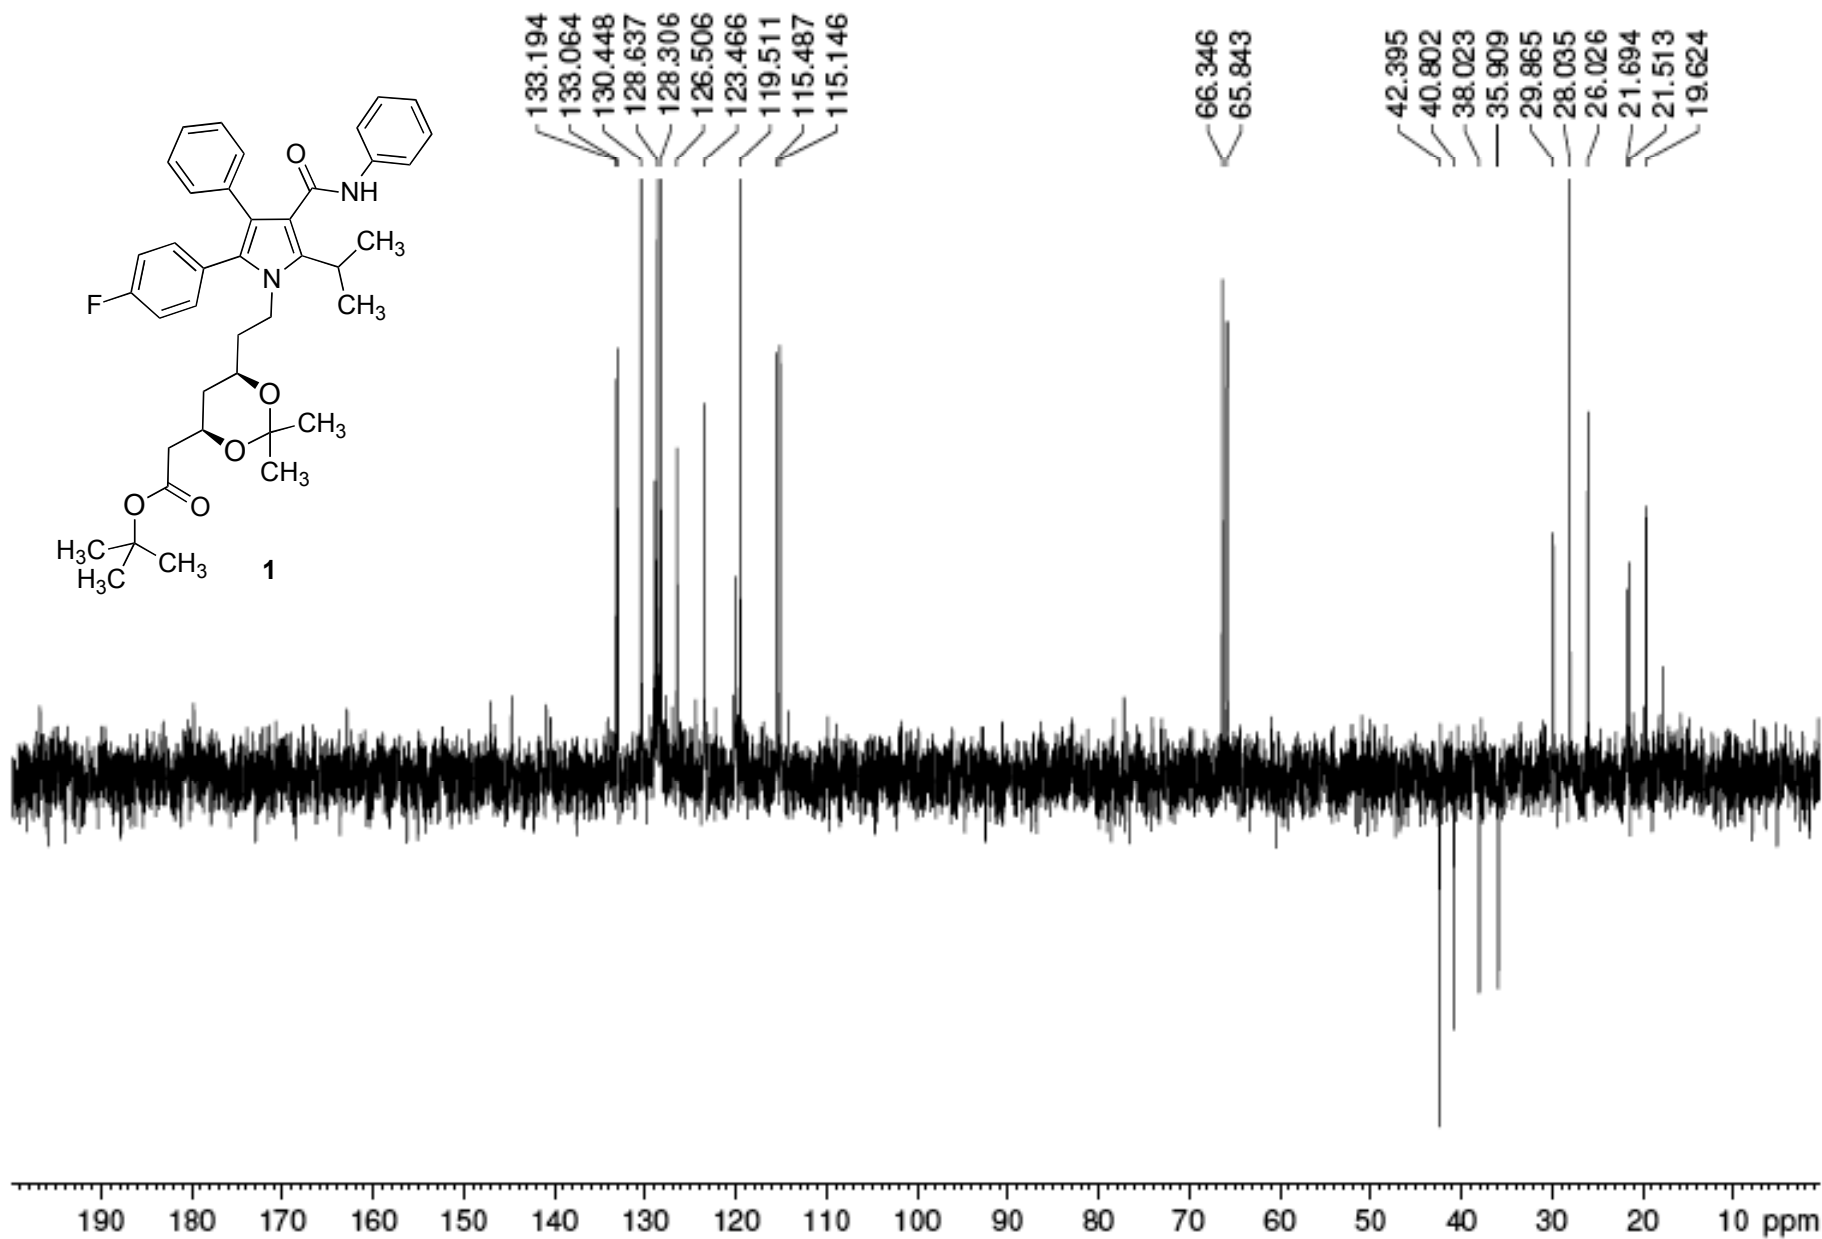

DEPT-135 spectrum of compound **1**

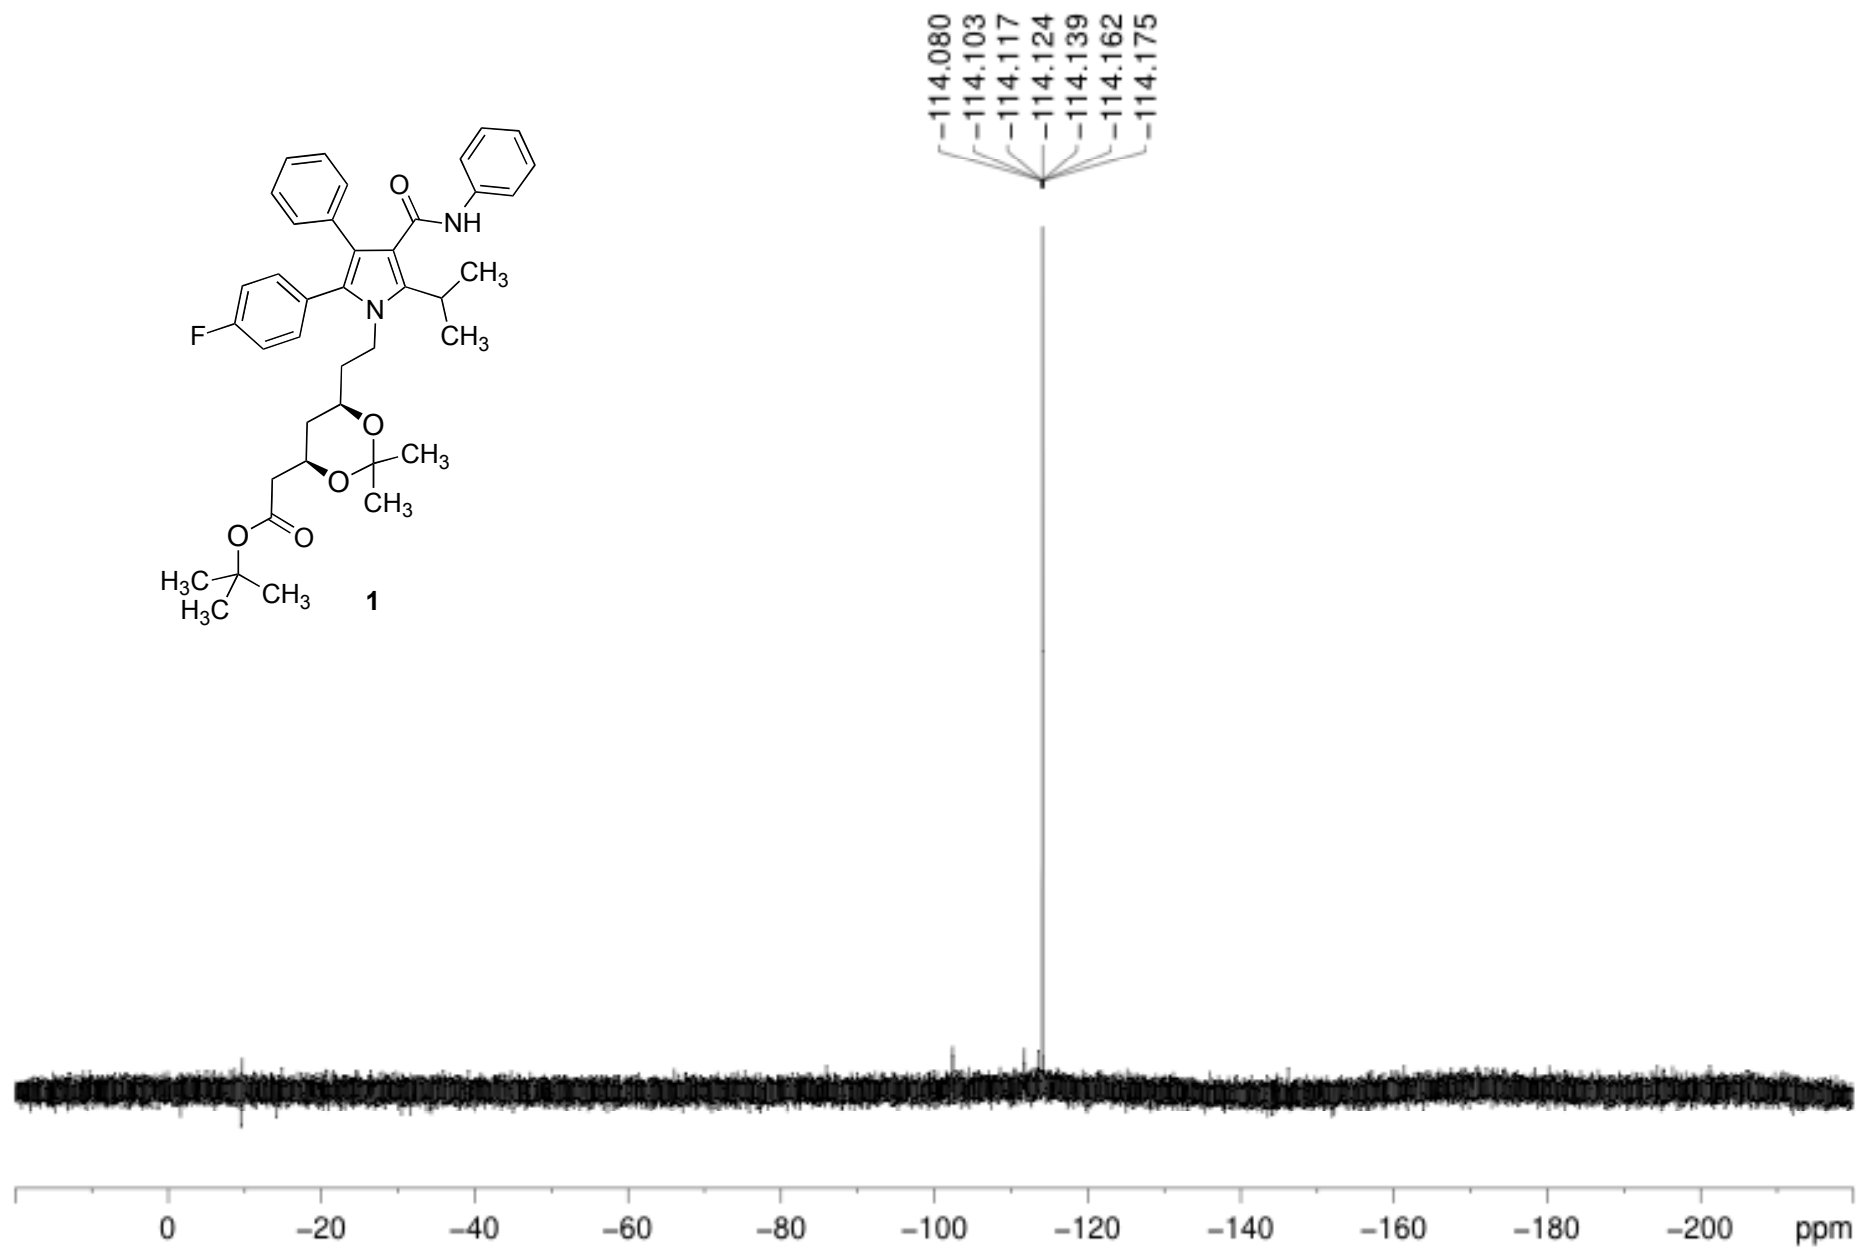

$^{19}\text{F}$  NMR spectrum of compound **1**  
S24



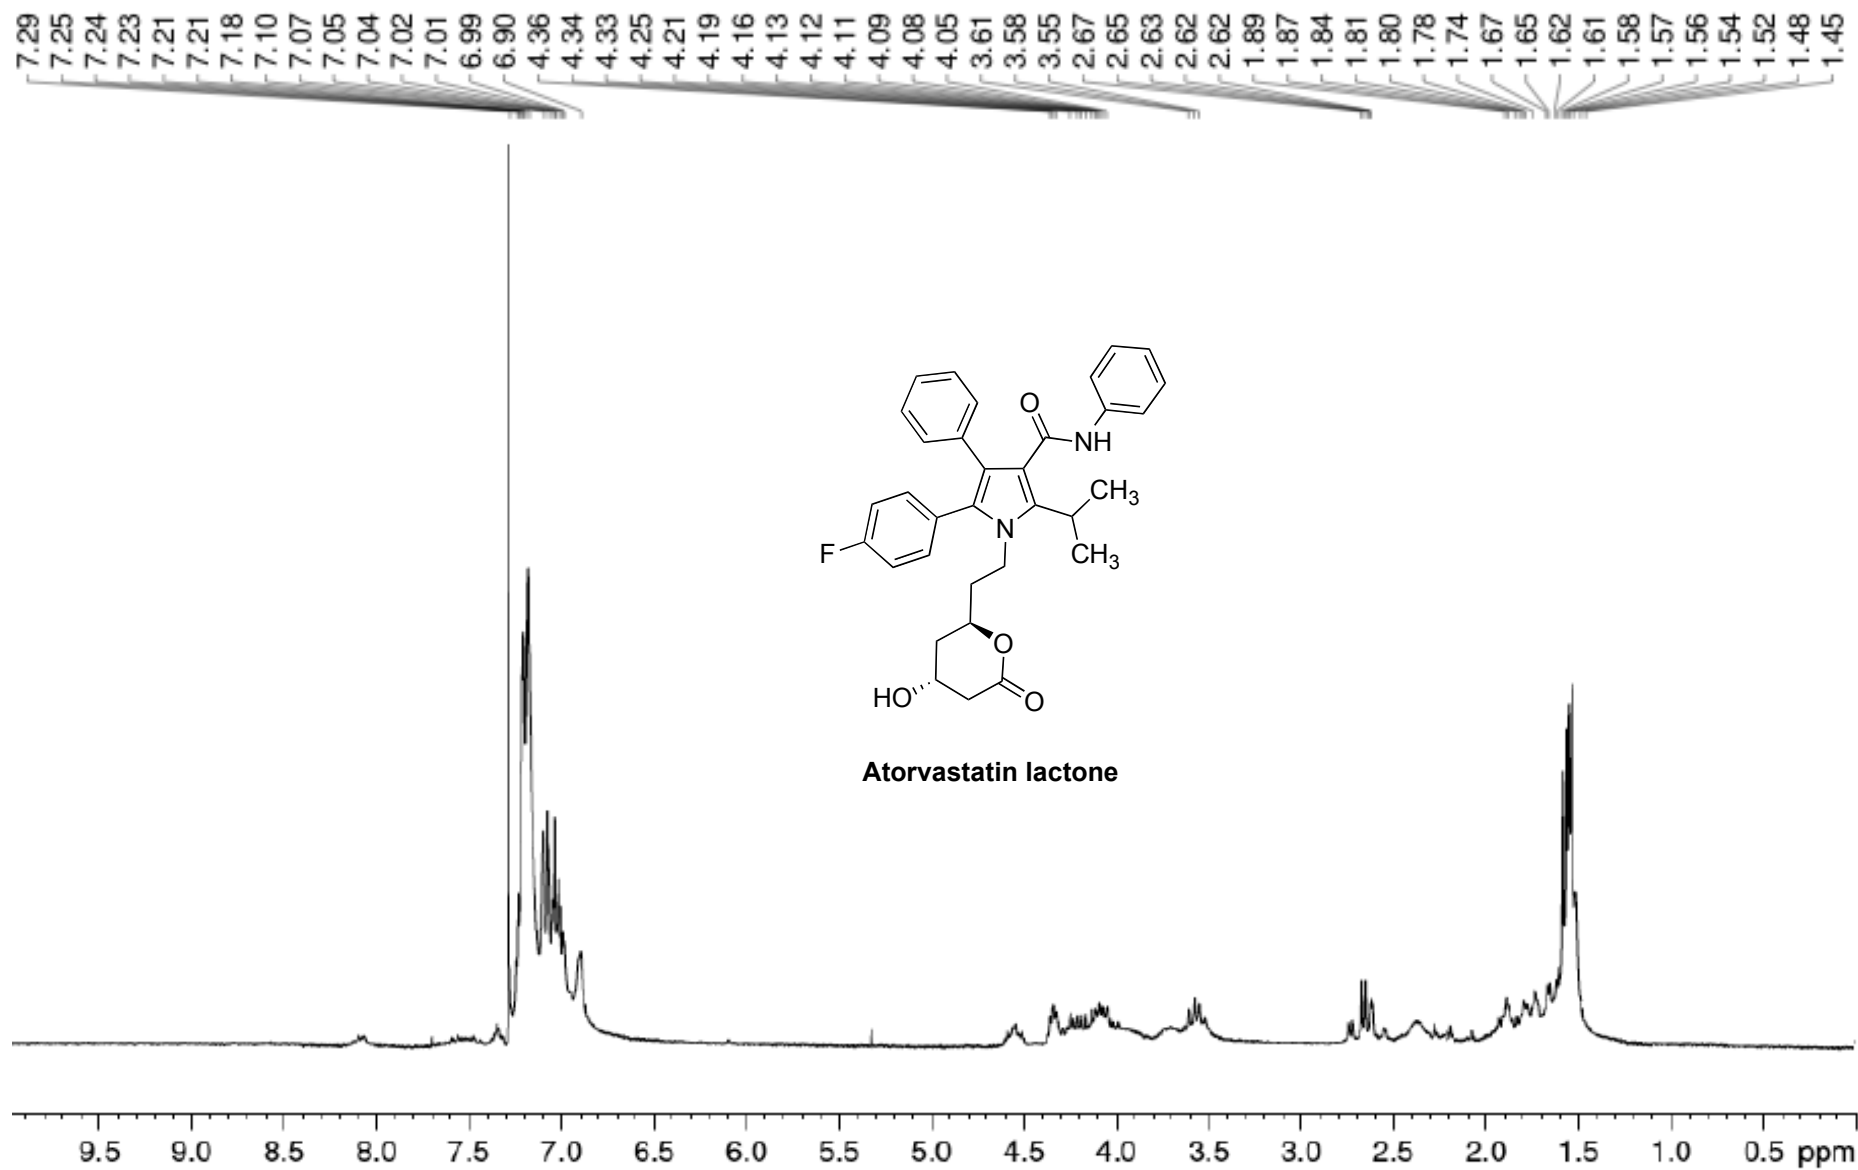

$^1\text{H}$  NMR spectrum of atorvastatin lactone (9)

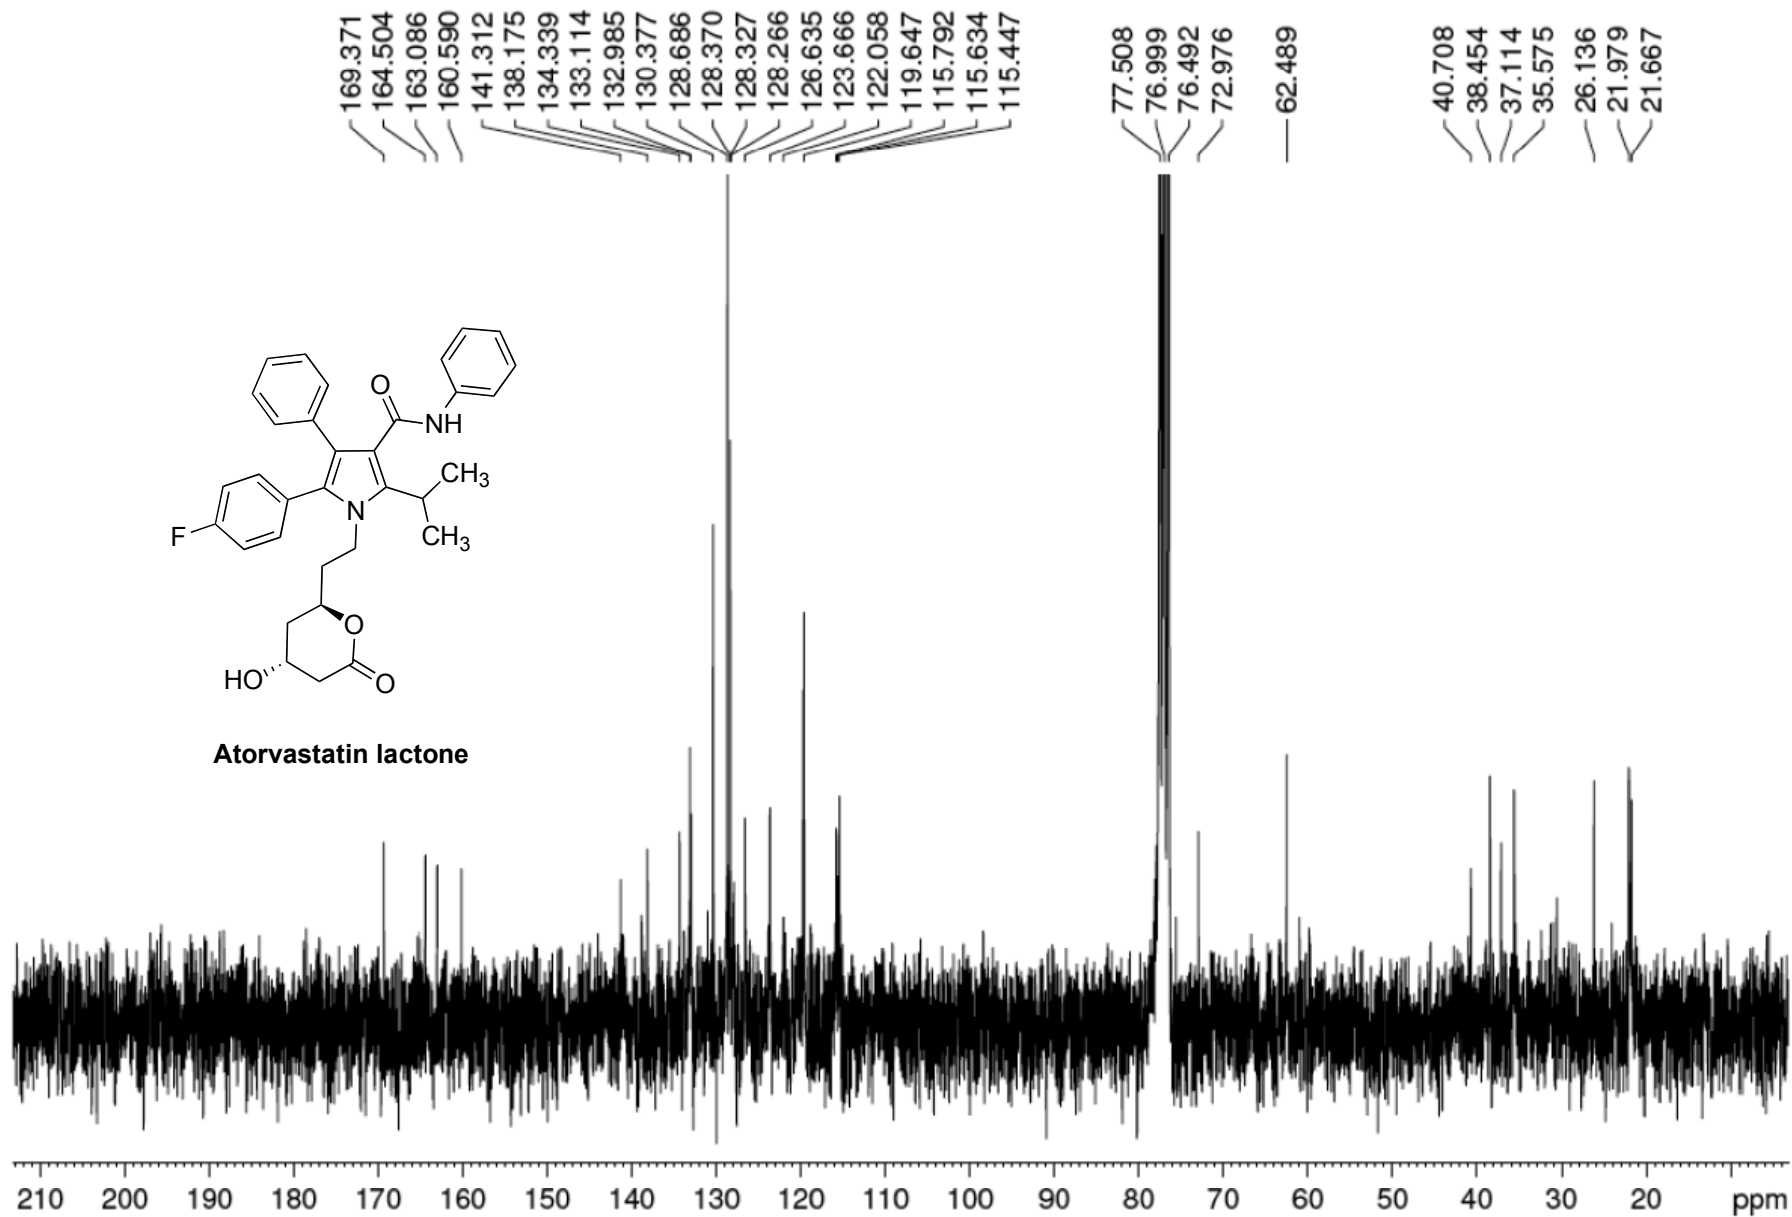

$^{13}\text{C}$  NMR spectrum of **atorvastatin lactone (9)**

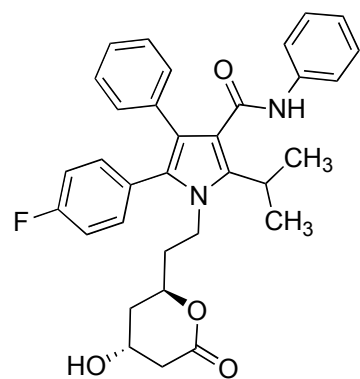

Atorvastatin lactone

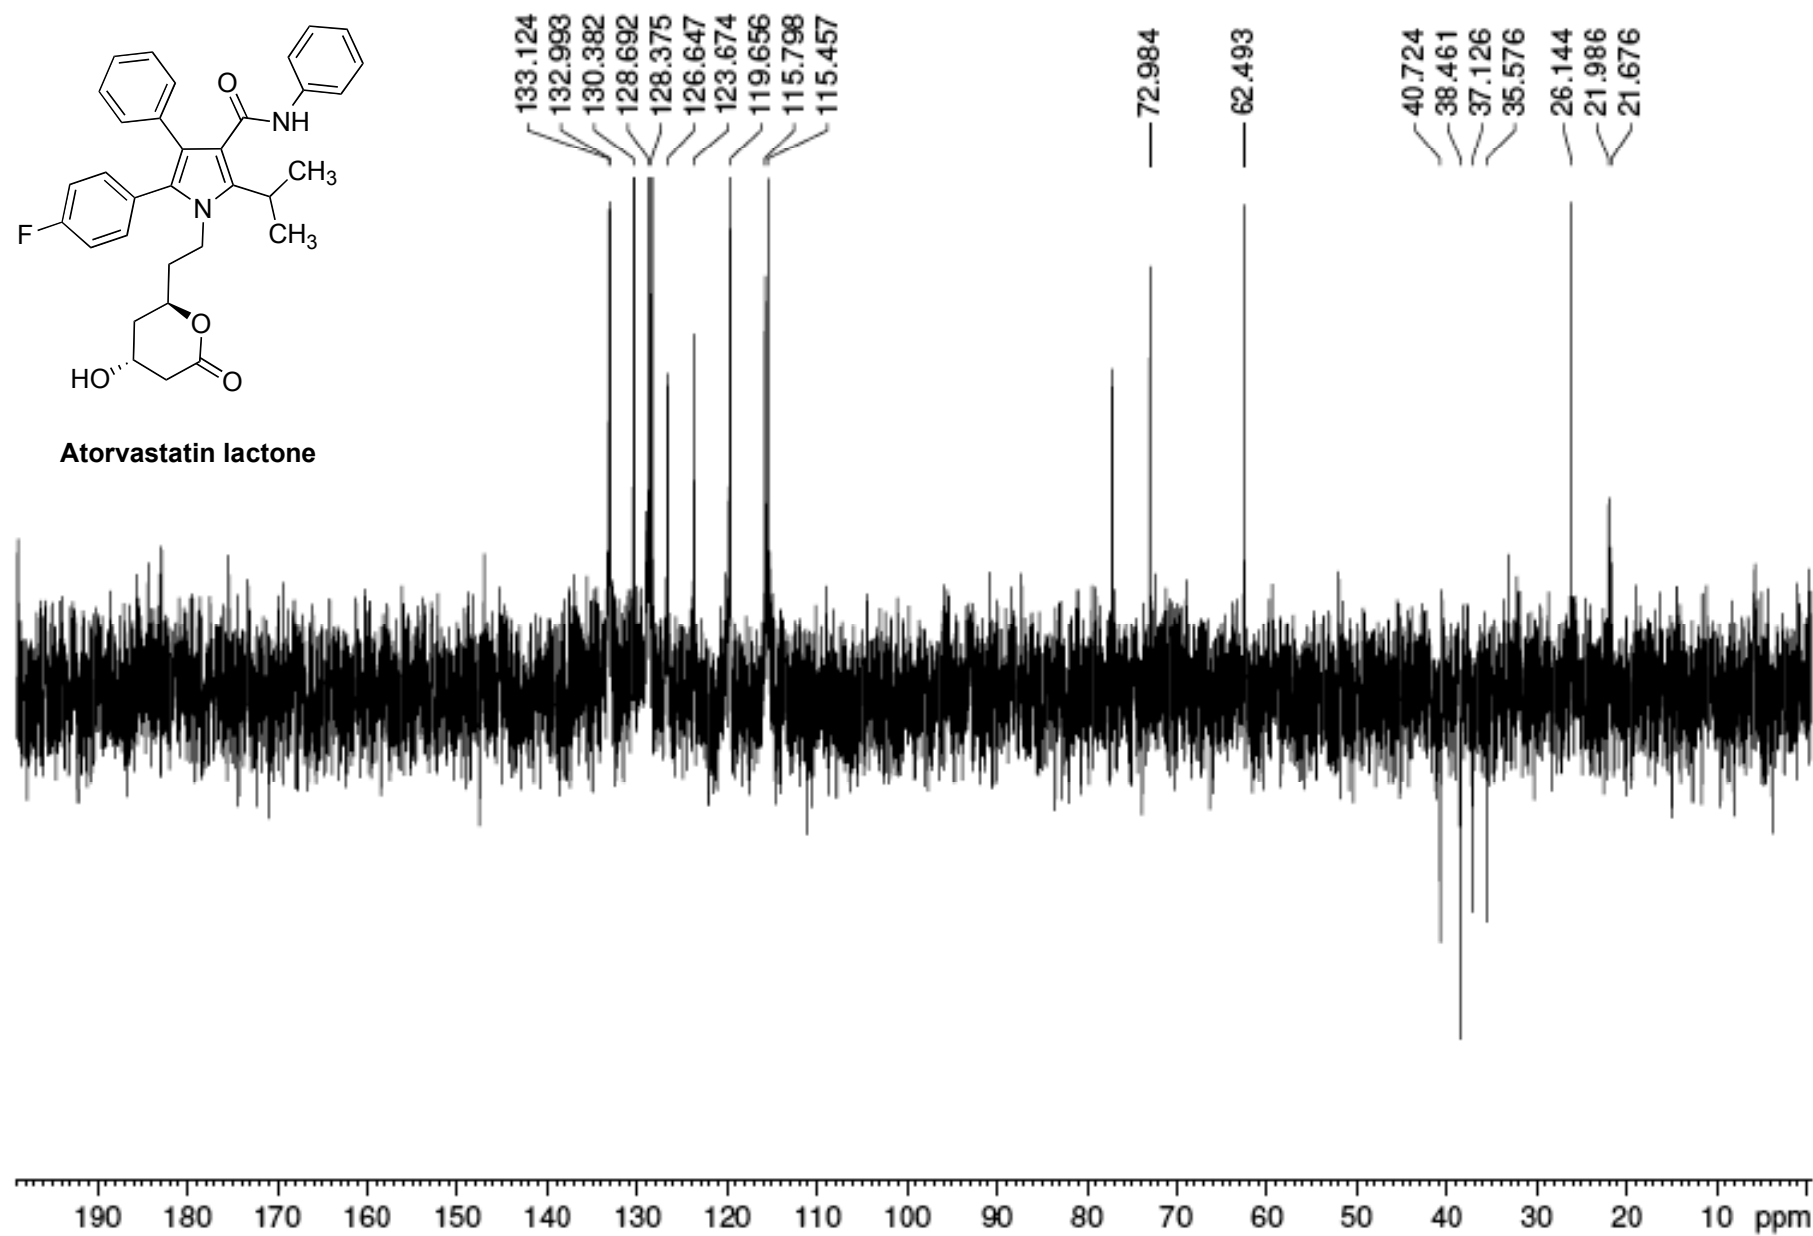

DEPT-135 spectrum of atorvastatin lactone (9)
